# Supplementary material for: A Computational Method for Prediction of Excretory Proteins and Application to Identification of Gastric Cancer Markers in Urine
Source: PLoS One. 2011 Feb 18;6(2):e16875. doi: 10.1371/journal.pone.0016875 (PMC3041827; doi:10.1371/journal.pone.0016875)
Supplement: Table S4 — 715 differentially expressed Genes in the gastric cancer tissues and the normal tissues. The fold change K and the details of analysis are described in the paper http://csbl.bmb.uga.edu/~juancui/Publications/GC2009/Additional_material.pdf. (XLS) [file pone.0016875.s005.xls]

## Sheet: 715 genes differentially expres
traincript_id	Symbol	our_fold_change_cutoff	ttest_pvalue	ANOVA_pvalue	wilcoxon_sta	wilcoxon_pvalue	mean_Normal	mean_Tumor	mean_fold_change	Diseases	Entrez Gene Name	Location	Family	HUGO Gene Symbol
3761451	HOXB9	12	2.09e-06	8.77e-07	852	1.32e-12	9.51453	74.0228	7.77997	Cancer, Immunological Disease	homeobox B9	Nucleus	transcription regulator	HOXB9
3374874	GIF	12	1.69e-10	4.34e-11	4267	3.61e-10	1594.88	248.263	-6.42415	Genetic Disorder, Hematological Disease, Metabolic Disease	gastric intrinsic factor (vitamin B synthesis)	Extracellular Space	transporter	GIF
3859832	ATP4A	12	1.76e-09	4.22e-10	4276	2.88e-10	1887.98	249.218	-7.57563	Cancer, Dermatological Diseases and Conditions, Developmental Disorder, Gastrointestinal Disease, Genetic Disorder, Immunological Disease, Inflammatory Disease, Organismal Injury and Abnormalities, Respiratory Disease	ATPase, H+/K+ exchanging, alpha polypeptide	Plasma Membrane	transporter	ATP4A
3901361	CST1	12	6.12e-05	4.83e-05	874	2.45e-12	53.373	304.249	5.70044		cystatin SN	Unknown	other	CST1
3526655	ATP4B	12	1.65e-09	3.6e-10	4260	4.3e-10	2724.25	398.175	-6.84182	Cancer, Dermatological Diseases and Conditions, Gastrointestinal Disease, Genetic Disorder, Immunological Disease, Inflammatory Disease, Organismal Injury and Abnormalities, Respiratory Disease	ATPase, H+/K+ exchanging, beta polypeptide	Plasma Membrane	transporter	ATP4B
3761538	HOXB13	11	5.98e-05	5.56e-05	1307.5	1.1e-07	11.9453	38.2229	3.19983	Antigen Presentation, Cancer, Inflammatory Response, Reproductive System Disease	homeobox B13	Nucleus	transcription regulator	HOXB13
3023835	CPA2	11	2.27e-09	3.1e-10	4232	8.62e-10	519.061	54.9317	-9.44921		carboxypeptidase A2 (pancreatic)	Extracellular Space	peptidase	CPA2
2662623	GHRL	9	9.02e-08	2.47e-08	4163	4.55e-09	290.958	37.553	-7.74793	Antigen Presentation, Cancer, Cardiovascular Disease, Endocrine System Disorders, Genetic Disorder, Hepatic System Disease, Inflammatory Disease, Inflammatory Response, Neurological Disease, Nutritional Disease, Organismal Injury and Abnormalities, Psychological Disorders, Reproductive System Disease, Skeletal and Muscular Disorders	ghrelin/obestatin prepropeptide	Extracellular Space	growth factor	GHRL
2527814	VIL1	9	0.000471116	0.000468126	1400	7.53e-07	143.684	318.775	2.21858	Cancer, Gastrointestinal Disease, Genetic Disorder	villin 1	Cytoplasm	other	VIL1
3332780	PGA4	9	3.74e-10	1.34e-10	4096	2.13e-08	3047.06	618.908	-4.92329		pepsinogen 4, group I (pepsinogen A)	Unknown	peptidase	PGA4
3394660	TRIM29	8	1.65e-05	9.9e-06	1226	1.82e-08	26.6156	154.111	5.79026		tripartite motif-containing 29	Cytoplasm	transcription regulator	TRIM29
2435858	SPRR2A	7	0.0273849	0.0258534	1875.5	0.00202791	2.14793	33.3515	15.5272		small proline-rich protein 2A	Cytoplasm	other	SPRR2A
3312422	CLRN3	7	0.00153942	0.00151661	1698	0.000156311	86.0949	183.542	2.13185		clarin 3	Unknown	other	CLRN3
3007960	CLDN4	7	1.45e-08	8.79e-09	1083	6.1e-10	95.2832	326.586	3.42753	Cancer, Connective Tissue Disorders, Dermatological Diseases and Conditions, Endocrine System Disorders, Gastrointestinal Disease, Genetic Disorder, Hepatic System Disease, Organismal Injury and Abnormalities, Renal and Urological Disease, Reproductive System Disease, Respiratory Disease	claudin 4	Plasma Membrane	transmembrane receptor	CLDN4
3388807	MMP1	7	6.46e-05	4.18e-05	1079	5.52e-10	84.6698	484.271	5.71953	Cancer, Cardiovascular Disease, Connective Tissue Disorders, Dermatological Diseases and Conditions, Developmental Disorder, Genetic Disorder, Hepatic System Disease, Inflammatory Disease, Inflammatory Response, Neurological Disease, Organismal Injury and Abnormalities, Reproductive System Disease, Skeletal and Muscular Disorders	matrix metallopeptidase 1 (interstitial collagenase)	Extracellular Space	peptidase	MMP1
3866785	SULT2A1	6	3.51e-05	2.35e-05	4233	8.41e-10	55.6849	12.4258	-4.48137		sulfotransferase family, cytosolic, 2A, dehydroepiandrosterone (DHEA)-preferring, member 1	Cytoplasm	enzyme	SULT2A1
3652867	SCNN1G	6	0.000374912	0.000325898	4165	4.34e-09	71.7218	16.4781	-4.35255	Cardiovascular Disease, Connective Tissue Disorders, Genetic Disorder, Metabolic Disease, Respiratory Disease, Skeletal and Muscular Disorders	sodium channel, nonvoltage-gated 1, gamma	Plasma Membrane	ion channel	SCNN1G
2764478	CCKAR	6	0.000249024	0.000247447	4273	3.1e-10	203.8	64.274	-3.1708	Endocrine System Disorders, Gastrointestinal Disease, Genetic Disorder, Hepatic System Disease, Inflammatory Disease	cholecystokinin A receptor	Plasma Membrane	G-protein coupled receptor	CCKAR
3549092	CHGA	6	1.55e-08	4.72e-09	4232	8.62e-10	336.553	76.6618	-4.3901	Cancer, Cardiovascular Disease, Developmental Disorder, Genetic Disorder, Hematological Disease, Neurological Disease, Renal and Urological Disease, Reproductive System Disease	chromogranin A (parathyroid secretory protein 1)	Extracellular Space	other	CHGA
3151719	ANXA13	6	0.0436958	0.0436445	1499	5.12e-06	45.9608	87.0457	1.89391		annexin A13	Plasma Membrane	other	ANXA13
3824623	SLC5A5	6	1.7e-07	6.64e-08	4121	1.21e-08	509.189	108.067	-4.71179	Cancer, Endocrine System Disorders, Genetic Disorder, Metabolic Disease, Reproductive System Disease	solute carrier family 5 (sodium iodide symporter), member 5	Plasma Membrane	transporter	SLC5A5
3042994	HOXA13	6	1.39e-08	3.69e-09	1134	2.12e-09	22.1718	109.228	4.92643	Developmental Disorder, Gastrointestinal Disease, Genetic Disorder, Renal and Urological Disease, Reproductive System Disease	homeobox A13	Nucleus	transcription regulator	HOXA13
3417500	SLC39A5	6	0.00483124	0.00481811	1418	1.08e-06	83.225	169.688	2.03891	Cancer, Gastrointestinal Disease, Genetic Disorder	solute carrier family 39 (metal ion transporter), member 5	Plasma Membrane	transporter	SLC39A5
3056292	CLDN3	6	2.55e-07	1.2e-07	1157	3.67e-09	53.8575	232.822	4.32293	Cancer, Connective Tissue Disorders, Dermatological Diseases and Conditions, Gastrointestinal Disease, Genetic Disorder, Reproductive System Disease, Respiratory Disease	claudin 3	Plasma Membrane	transmembrane receptor	CLDN3
3144859	CDH17	6	0.000251352	0.000236089	1527	8.58e-06	135.903	348.809	2.5666	Cancer	cadherin 17, LI cadherin (liver-intestine)	Plasma Membrane	transporter	CDH17
3046444	SFRP4	6	2.76e-06	2.25e-06	1158	3.76e-09	217.395	724.999	3.33494	Cancer, Reproductive System Disease	secreted frizzled-related protein 4	Plasma Membrane	transmembrane receptor	SFRP4
3834379	CEACAM6	6	2.93e-07	1.43e-07	1231	2.04e-08	204.124	897.441	4.39654	Antigen Presentation, Cancer, Endocrine System Disorders, Inflammatory Response, Reproductive System Disease	carcinoembryonic antigen-related cell adhesion molecule 6 (non-specific cross reacting antigen)	Plasma Membrane	other	CEACAM6
4037778	DMBT1	6	0.00336375	0.00327619	1587	2.49e-05	422.839	919.946	2.17564	Antigen Presentation, Cancer, Gastrointestinal Disease, Genetic Disorder, Inflammatory Disease, Inflammatory Response, Neurological Disease	deleted in malignant brain tumors 1	Plasma Membrane	transmembrane receptor	DMBT1
3416256	HOXC13	5	0.0169469	0.0162499	1912.5	0.00326802	3.97857	16.262	4.0874	Dermatological Diseases and Conditions, Genetic Disorder	homeobox C13	Nucleus	transcription regulator	HOXC13
3494629	SCEL	5	0.000179953	0.000129928	1405	8.32e-07	3.47634	17.5654	5.05285		sciellin	Cytoplasm	other	SCEL
3733238	KCNJ16	5	1.65e-09	3.49e-10	4297	1.69e-10	133.232	23.2918	-5.72014		potassium inwardly-rectifying channel, subfamily J, member 16	Plasma Membrane	ion channel	KCNJ16
2443952	MYOC	5	2.48e-08	7.56e-09	4446	3.15e-12	164.029	35.8221	-4.57898	Genetic Disorder, Ophthalmic Disease	myocilin, trabecular meshwork inducible glucocorticoid response	Cytoplasm	other	MYOC
3710277	C17orf48	5	6.41e-11	1.01e-11	4277	2.8e-10	237.105	51.8527	-4.57266
2351763	CHIA	5	3.68e-05	2.13e-05	4049	6.07e-08	925.014	54.1948	-17.0683	Antigen Presentation, Antimicrobial Response, Inflammatory Response, Organismal Injury and Abnormalities, Respiratory Disease	chitinase, acidic	Extracellular Space	enzyme	CHIA
2455933	ESRRG	5	5.71e-10	7.83e-11	4416	7.22e-12	356.408	59.781	-5.9619	Cancer, Genetic Disorder, Neurological Disease, Reproductive System Disease	estrogen-related receptor gamma	Nucleus	ligand-dependent nuclear receptor	ESRRG
3919101	KCNE2	5	4.91e-09	1.72e-09	4338	5.83e-11	370.577	73.3358	-5.05316	Cancer, Cardiovascular Disease, Gastrointestinal Disease, Genetic Disorder, Organismal Injury and Abnormalities, Respiratory Disease	potassium voltage-gated channel, Isk-related family, member 2	Plasma Membrane	ion channel	KCNE2
4000538	FIGF	5	0.0298884	0.029819	3941	5.91e-07	127.625	75.2383	-1.69628	Cancer, Connective Tissue Disorders, Dermatological Diseases and Conditions, Gastrointestinal Disease, Organismal Injury and Abnormalities	c-fos induced growth factor (vascular endothelial growth factor D)	Extracellular Space	growth factor	FIGF
3604147	KIAA1199	5	0.00206085	0.00203379	893	4.16e-12	30.4762	90.8386	2.98064	Cancer, Gastrointestinal Disease, Reproductive System Disease	KIAA1199	Unknown	other	KIAA1199
2442493	GPA33	5	0.0206253	0.020486	1899	0.00275229	70.7161	130.875	1.85071		glycoprotein A33 (transmembrane)	Plasma Membrane	other	GPA33
3388830	MMP3	5	0.000167343	0.000120174	1377	4.72e-07	27.5335	150.29	5.45842	Antigen Presentation, Auditory Disease, Cancer, Cardiovascular Disease, Connective Tissue Disorders, Dermatological Diseases and Conditions, Developmental Disorder, Gastrointestinal Disease, Genetic Disorder, Immunological Disease, Inflammatory Disease, Inflammatory Response, Organismal Injury and Abnormalities, Reproductive System Disease, Skeletal and Muscular Disorders	matrix metallopeptidase 3 (stromelysin 1, progelatinase)	Extracellular Space	peptidase	MMP3
3016070	MUC17	5	0.0106312	0.010572	1723	0.000230528	89.8548	177.264	1.97278		mucin 17, cell surface associated	Unknown	other	MUC17
3472366	SDS	5	5.3e-08	2.45e-08	961	2.64e-11	62.8578	232.866	3.70464		serine dehydratase	Cytoplasm	enzyme	SDS
3119200	PSCA	5	1.2e-07	5.75e-08	4032	8.78e-08	1305.53	360.7	-3.61942	Cancer, Connective Tissue Disorders, Reproductive System Disease	prostate stem cell antigen	Plasma Membrane	other	PSCA
3743551	CLDN7	5	4.55e-09	2.89e-09	1022	1.3e-10	157.066	520.485	3.3138		claudin 7	Plasma Membrane	other	CLDN7
3886765	PI3	5	7.22e-05	5.69e-05	1406	8.49e-07	337.474	1136.14	3.36661	Antigen Presentation, Cancer, Cardiovascular Disease, Dermatological Diseases and Conditions, Infectious Disease, Inflammatory Response, Respiratory Disease	peptidase inhibitor 3, skin-derived	Extracellular Space	other	PI3
3490892	OLFM4	5	4.79e-05	4.2e-05	1405	8.32e-07	576.879	1703.18	2.95241		olfactomedin 4	Unknown	other	OLFM4
3256914	LIPF	5	9.14e-13	6.66e-13	4315	1.06e-10	5254.14	1759.48	-2.98619	Cardiovascular Disease, Endocrine System Disorders, Genetic Disorder, Metabolic Disease, Nutritional Disease, Respiratory Disease	lipase, gastric	Extracellular Space	enzyme	LIPF
2392985	FLJ42875	4	4.37e-09	1.16e-09	4371	2.44e-11	50.3548	11.503	-4.37754
3026216	CHRM2	4	0.0307496	0.0303239	3208	0.0335662	21.4424	11.8183	-1.81435	Cancer, Cardiovascular Disease, Dermatological Diseases and Conditions, Endocrine System Disorders, Gastrointestinal Disease, Genetic Disorder, Hematological Disease, Immunological Disease, Infection Mechanism, Infectious Disease, Inflammatory Disease, Metabolic Disease, Neurological Disease, Nutritional Disease, Ophthalmic Disease, Organismal Injury and Abnormalities, Psychological Disorders, Re…	cholinergic receptor, muscarinic 2	Plasma Membrane	G-protein coupled receptor	CHRM2
3683584	PDILT	4	7.77e-06	5.97e-06	4224	1.05e-09	61.4903	13.8237	-4.44819
3851250	ZNF20	4	1.41e-05	1.03e-05	3826	5.52e-06	45.1522	14.0749	-3.208		zinc finger protein 20	Nucleus	other	ZNF20
3289189	ASAH2	4	0.00134082	0.00115688	4182	2.9e-09	70.8905	17.0185	-4.1655	Hepatic System Disease	N-acylsphingosine amidohydrolase (non-lysosomal ceramidase) 2	Cytoplasm	enzyme	ASAH2
3841506	LAIR2	4	0.00158593	0.0015855	1510	6.28e-06	7.99731	17.2085	2.15179		leukocyte-associated immunoglobulin-like receptor 2	Plasma Membrane	other	LAIR2
2474430	TRIM54	4	0.0286483	0.0283022	1812.5	0.000860105	11.1506	21.6481	1.94143	Cardiovascular Disease, Organismal Injury and Abnormalities, Skeletal and Muscular Disorders	tripartite motif-containing 54	Cytoplasm	other	TRIM54
3802924	DSC3	4	0.0216511	0.0203212	1442	1.73e-06	4.00678	25.8156	6.44298		desmocollin 3	Plasma Membrane	other	DSC3
3541450	RDH12	4	1.24e-07	4.05e-08	4145	6.93e-09	117.291	26.5518	-4.41743	Genetic Disorder, Neurological Disease, Ophthalmic Disease	retinol dehydrogenase 12 (all-trans/9-cis/11-cis)	Cytoplasm	enzyme	RDH12
2790626	FGA	4	2.38e-06	1.64e-06	4028	9.57e-08	117.478	29.3199	-4.00676	Antigen Presentation, Cancer, Connective Tissue Disorders, Gastrointestinal Disease, Genetic Disorder, Hematological Disease, Immunological Disease, Inflammatory Disease, Inflammatory Response, Metabolic Disease, Psychological Disorders, Skeletal and Muscular Disorders	fibrinogen alpha chain	Extracellular Space	other	FGA
3788049	C18orf24	4	1.88e-07	1.29e-07	1151	3.19e-09	12.4759	36.2353	2.90442
2452754	SLC26A9	4	1.61e-08	6.37e-09	4038	7.71e-08	128.169	38.1632	-3.35846		solute carrier family 26, member 9	Plasma Membrane	transporter	SLC26A9
2779302	ADH7	4	9.68e-07	4.17e-07	4106	1.7e-08	178.675	38.9109	-4.59191		alcohol dehydrogenase 7 (class IV), mu or sigma polypeptide	Cytoplasm	enzyme	ADH7
3215560	FBP2	4	1.3e-10	6.63e-11	4308	1.27e-10	143.484	43.3897	-3.30687		fructose-1,6-bisphosphatase 2	Cytoplasm	phosphatase	FBP2
3802396	AQP4	4	4.85e-07	1.78e-07	4375	2.19e-11	463.614	52.4659	-8.83647	Genetic Disorder, Neurological Disease	aquaporin 4	Plasma Membrane	transporter	AQP4
2901417	TRIM15	4	8.13e-06	7.65e-06	1313	1.24e-07	31.001	74.0161	2.38754		tripartite motif-containing 15	Unknown	other	TRIM15
3758510	ETV4	4	7.31e-08	2.57e-08	994	6.31e-11	23.3773	104.536	4.47168	Cancer, Genetic Disorder, Neurological Disease, Reproductive System Disease, Respiratory Disease	ets variant 4	Nucleus	transcription regulator	ETV4
3642765	PDIA2	4	9.4e-05	8.99e-05	3990	2.15e-07	305.96	105.4	-2.90284	Hematological Disease, Immunological Disease, Infectious Disease, Respiratory Disease	protein disulfide isomerase family A, member 2	Cytoplasm	enzyme	PDIA2
3264997	C10orf81	4	6.84e-05	5.94e-05	1415	1.02e-06	39.2082	105.968	2.70269
3445574	GUCY2C	4	0.00123759	0.00119667	1681	0.000119398	53.625	117.885	2.19832		guanylate cyclase 2C (heat stable enterotoxin receptor)	Plasma Membrane	kinase	GUCY2C
3201437	CDKN2A	4	0.00411767	0.0041149	1198	9.59e-09	43.3701	132.482	3.05468	Antigen Presentation, Cancer, Cardiovascular Disease, Connective Tissue Disorders, Dermatological Diseases and Conditions, Endocrine System Disorders, Gastrointestinal Disease, Genetic Disorder, Hematological Disease, Hepatic System Disease, Immunological Disease, Infection Mechanism, Inflammatory Disease, Inflammatory Response, Neurological Disease, Organismal Injury and Abnormalities, Renal and…	cyclin-dependent kinase inhibitor 2A (melanoma, p16, inhibits CDK4)	Nucleus	transcription regulator	CDKN2A
2584134	FAP	4	5.99e-08	2.6e-08	1069	4.3e-10	41.6865	160.606	3.8527	Cancer, Reproductive System Disease	fibroblast activation protein, alpha	Cytoplasm	peptidase	FAP
3720322	PPP1R1B	4	0.00254086	0.00216723	1476	3.32e-06	53.577	206.377	3.85196	Cancer, Gastrointestinal Disease, Genetic Disorder, Neurological Disease, Psychological Disorders	protein phosphatase 1, regulatory (inhibitor) subunit 1B	Cytoplasm	phosphatase	PPP1R1B
3791782	SERPINB5	4	2.18e-06	1.61e-06	1185	7.1e-09	60.1207	215.683	3.5875	Cancer, Cardiovascular Disease, Connective Tissue Disorders, Genetic Disorder, Hematological Disease, Immunological Disease, Inflammatory Disease, Reproductive System Disease, Respiratory Disease, Skeletal and Muscular Disorders	serpin peptidase inhibitor, clade B (ovalbumin), member 5	Extracellular Space	other	SERPINB5
2710599	CLDN1	4	2.58e-08	2.29e-08	869	2.13e-12	73.4648	259.479	3.53201	Cancer, Dermatological Diseases and Conditions, Gastrointestinal Disease, Genetic Disorder	claudin 1	Plasma Membrane	other	CLDN1
2398706	MFAP2	4	1.44e-11	2.51e-12	893	4.16e-12	77.1449	271.988	3.52568		microfibrillar-associated protein 2	Extracellular Space	other	MFAP2
2817576	THBS4	4	0.0107344	0.0102995	2092	0.0251723	125.985	282.544	2.24268		thrombospondin 4	Extracellular Space	other	THBS4
2451593	CHI3L1	4	6.35e-07	3.02e-07	989	5.54e-11	65.3644	307.394	4.70277	Cancer, Genetic Disorder, Inflammatory Disease, Neurological Disease, Psychological Disorders, Reproductive System Disease, Respiratory Disease	chitinase 3-like 1 (cartilage glycoprotein-39)	Extracellular Space	enzyme	CHI3L1
3887049	UBE2C	4	6.79e-08	4.34e-08	1171	5.11e-09	111.276	353.012	3.17241	Cancer, Endocrine System Disorders, Gastrointestinal Disease, Genetic Disorder, Neurological Disease, Renal and Urological Disease, Reproductive System Disease, Respiratory Disease, Skeletal and Muscular Disorders	ubiquitin-conjugating enzyme E2C	Cytoplasm	enzyme	UBE2C
3110317	CTHRC1	4	9.96e-08	4.18e-08	950	1.97e-11	96.2092	361.002	3.75226		collagen triple helix repeat containing 1	Extracellular Space	other	CTHRC1
3388859	MMP12	4	0.000805289	0.000786317	1424	1.21e-06	153.636	413.085	2.68872	Antigen Presentation, Cancer, Cardiovascular Disease, Genetic Disorder, Hypersensitivity Response, Inflammatory Disease, Inflammatory Response, Organismal Injury and Abnormalities, Renal and Urological Disease, Reproductive System Disease, Respiratory Disease	matrix metallopeptidase 12 (macrophage elastase)	Extracellular Space	peptidase	MMP12
2735027	SPP1	4	0.0010524	0.00105143	1053	2.88e-10	162.945	471.661	2.8946	Antigen Presentation, Cancer, Cardiovascular Disease, Connective Tissue Disorders, Dermatological Diseases and Conditions, Endocrine System Disorders, Gastrointestinal Disease, Genetic Disorder, Hematological Disease, Hepatic System Disease, Immunological Disease, Infectious Disease, Inflammatory Disease, Inflammatory Response, Metabolic Disease, Neurological Disease, Organismal Injury and Abnorm…	secreted phosphoprotein 1	Extracellular Space	cytokine	SPP1
2985781	THBS2	4	9.42e-09	3.12e-09	1039	2.02e-10	132.191	474.456	3.58918	Antigen Presentation, Cancer, Cardiovascular Disease, Connective Tissue Disorders, Genetic Disorder, Hematological Disease, Immunological Disease, Inflammatory Disease, Inflammatory Response, Organismal Injury and Abnormalities, Reproductive System Disease, Skeletal and Muscular Disorders	thrombospondin 2	Extracellular Space	other	THBS2
3995633	BGN	4	2.87e-08	1.63e-08	962	2.71e-11	160.703	516.665	3.21503	Cancer, Cardiovascular Disease, Connective Tissue Disorders, Gastrointestinal Disease, Genetic Disorder, Hematological Disease, Immunological Disease, Infectious Disease, Inflammatory Disease, Metabolic Disease, Neurological Disease, Renal and Urological Disease, Skeletal and Muscular Disorders	biglycan	Extracellular Space	other	BGN
4002394	SMPX	3	0.0214303	0.0205528	3186	0.0414362	24.1645	10.9769	-2.2014		small muscle protein, X-linked	Unknown	other	SMPX
2772088	UGT2B17	3	0.00196988	0.00189203	3700	5.1e-05	27.3914	13.5211	-2.02583	Cancer, Reproductive System Disease	UDP glucuronosyltransferase 2 family, polypeptide B17	Cytoplasm	enzyme	UGT2B17
2794704	ASB5	3	0.00817685	0.00770599	3487	0.00129439	42.0451	15.1039	-2.78373	Cancer, Reproductive System Disease	ankyrin repeat and SOCS box-containing 5	Nucleus	transcription regulator	ASB5
2602770	DNER	3	7.17e-08	2.51e-08	4299	1.6e-10	68.3133	17.7316	-3.85263		delta/notch-like EGF repeat containing	Plasma Membrane	transmembrane receptor	DNER
2369609	C1orf125	3	0.0100238	0.0100237	3673	7.97e-05	33.6477	20.2736	-1.65968
3333417	SCGB2A1	3	0.000544223	0.000519056	3618	0.000191524	46.8103	22.1116	-2.117	Cancer, Reproductive System Disease	secretoglobin, family 2A, member 1	Unknown	other	SCGB2A1
3969358	EGFL6	3	3.24e-06	1.99e-06	1178	6.03e-09	5.78324	22.8913	3.95821		EGF-like-domain, multiple 6	Extracellular Space	other	EGFL6
3186137	ORM2	3	0.000293386	0.000292741	4033	8.59e-08	55.8838	24.3598	-2.2941	Antigen Presentation, Inflammatory Response, Neurological Disease, Reproductive System Disease	orosomucoid 2	Extracellular Space	other	ORM2
2991995	ABCB5	3	2.01e-06	1.6e-06	4086	2.67e-08	111.616	25.2242	-4.42497	Cancer	ATP-binding cassette, sub-family B (MDR/TAP), member 5	Unknown	other	ABCB5
2681044	FAM19A4	3	0.0013092	0.00108957	3594	0.000276896	93.9951	25.3471	-3.70831		family with sequence similarity 19 (chemokine (C-C motif)-like), member A4	Extracellular Space	other	FAM19A4
2772805	GC	3	5.88e-05	3.79e-05	4221	1.13e-09	127.754	25.9678	-4.9197	Antigen Presentation, Cancer, Endocrine System Disorders, Gastrointestinal Disease, Genetic Disorder, Hematological Disease, Hepatic System Disease, Immunological Disease, Inflammatory Response, Metabolic Disease, Neurological Disease	group-specific component (vitamin D binding protein)	Extracellular Space	transporter	GC
3545022	ESRRB	3	0.00112946	0.00109487	3766	1.64e-05	59.0461	28.6802	-2.05878	Auditory Disease, Genetic Disorder, Neurological Disease	estrogen-related receptor beta	Nucleus	ligand-dependent nuclear receptor	ESRRB
3080283	cdna(scan)	3	5.56e-06	5.08e-06	1224	1.74e-08	15.0562	33.7254	2.23997
3696554	TMED6	3	9.49e-07	3.94e-07	4214	1.34e-09	191.676	35.3944	-5.41544		transmembrane emp24 protein transport domain containing 6	Cytoplasm	other	TMED6
3342426	C11orf82	3	1.02e-06	6.82e-07	1132	2.02e-09	11.5922	35.5254	3.06458
3998766	KAL1	3	2.25e-07	1.49e-07	1109	1.16e-09	14.6463	37.837	2.58339	Developmental Disorder, Endocrine System Disorders, Genetic Disorder, Reproductive System Disease	Kallmann syndrome 1 sequence	Extracellular Space	other	KAL1
3069366	WNT2	3	7.44e-09	1.68e-09	797	2.73e-13	9.84969	38.4871	3.90744	Cancer, Connective Tissue Disorders, Genetic Disorder, Respiratory Disease	wingless-type MMTV integration site family member 2	Extracellular Space	other	WNT2
3126739	LZTS1	3	0.00608267	0.00588893	1378	4.82e-07	15.928	38.5831	2.42235	Cancer, Gastrointestinal Disease, Renal and Urological Disease, Reproductive System Disease	leucine zipper, putative tumor suppressor 1	Nucleus	transcription regulator	LZTS1
3888522	SNAI1	3	0.00040828	0.000384562	1524.5	8.2e-06	18.6076	39.7568	2.13659	Cancer, Developmental Disorder, Gastrointestinal Disease, Genetic Disorder	snail homolog 1 (Drosophila)	Nucleus	other	SNAI1
3815710	EFNA2	3	0.0298717	0.0298289	1589	2.58e-05	25.9652	42.3412	1.63069	Cancer, Neurological Disease	ephrin-A2	Plasma Membrane	kinase	EFNA2
2450345	KIF14	3	1.83e-07	1.26e-07	1058	3.26e-10	16.6057	44.989	2.70925	Cancer, Reproductive System Disease	kinesin family member 14	Cytoplasm	other	KIF14
3833926	CYP2B6	3	0.00069479	0.00066465	1621	4.46e-05	19.7125	53.9738	2.73805	Cancer, Neurological Disease	cytochrome P450, family 2, subfamily B, polypeptide 6	Cytoplasm	enzyme	CYP2B6
2571483	IL1A	3	0.000330657	0.000276076	1560	1.55e-05	18.7242	54.2133	2.89536	Antigen Presentation, Cancer, Cardiovascular Disease, Connective Tissue Disorders, Dermatological Diseases and Conditions, Endocrine System Disorders, Gastrointestinal Disease, Genetic Disorder, Hematological Disease, Hepatic System Disease, Hypersensitivity Response, Inflammatory Disease, Inflammatory Response, Metabolic Disease, Neurological Disease, Organismal Injury and Abnormalities, Renal a…	interleukin 1, alpha	Extracellular Space	cytokine	IL1A
3116839	WISP1	3	8.36e-08	3.49e-08	1199	9.82e-09	18.4601	54.279	2.94034	Cancer, Gastrointestinal Disease, Genetic Disorder, Renal and Urological Disease, Respiratory Disease	WNT1 inducible signaling pathway protein 1	Extracellular Space	other	WISP1
3150455	TNFRSF11B	3	1.97e-06	1.51e-06	976	3.93e-11	15.2082	56.9757	3.74638	Antigen Presentation, Cancer, Cardiovascular Disease, Connective Tissue Disorders, Dermatological Diseases and Conditions, Developmental Disorder, Gastrointestinal Disease, Genetic Disorder, Hematological Disease, Hepatic System Disease, Immunological Disease, Inflammatory Disease, Organismal Injury and Abnormalities, Renal and Urological Disease, Reproductive System Disease, Respiratory Disease,…	tumor necrosis factor receptor superfamily, member 11b	Plasma Membrane	transmembrane receptor	TNFRSF11B
3090697	CDCA2	3	1.31e-06	1.03e-06	1259	3.82e-08	21.9063	58.7381	2.68133	Cancer, Reproductive System Disease	cell division cycle associated 2	Nucleus	other	CDCA2
3311832	ADAM12	3	1.56e-05	9.05e-06	1032.5	1.71e-10	14.1702	58.9449	4.15978	Antigen Presentation, Cancer, Connective Tissue Disorders, Genetic Disorder, Inflammatory Response, Nutritional Disease, Organismal Injury and Abnormalities, Reproductive System Disease, Skeletal and Muscular Disorders	ADAM metallopeptidase domain 12	Plasma Membrane	peptidase	ADAM12
2830638	KIF20A	3	2.56e-08	1.36e-08	1057	3.18e-10	20.0719	60.9148	3.03484	Cancer, Endocrine System Disorders, Gastrointestinal Disease, Reproductive System Disease	kinesin family member 20A	Cytoplasm	transporter	KIF20A
2665572	SGOL1	3	4.37e-05	4.07e-05	1376	4.63e-07	27.1751	64.3823	2.36917		shugoshin-like 1 (S. pombe)	Nucleus	other	SGOL1
2379863	CENPF	3	6.96e-07	6.39e-07	1073	4.75e-10	25.6393	65.7328	2.56375	Cancer, Gastrointestinal Disease	centromere protein F, 350/400ka (mitosin)	Nucleus	other	CENPF
3521083	SOX21	3	5.69e-07	4.16e-07	3913	1.04e-06	175.546	66.4438	-2.64202		SRY (sex determining region Y)-box 21	Nucleus	transcription regulator	SOX21
3248289	CDC2	3	7.29e-06	6.74e-06	1236	2.28e-08	27.5708	68.3439	2.47885	Cancer, Dermatological Diseases and Conditions, Endocrine System Disorders, Gastrointestinal Disease, Genetic Disorder, Hematological Disease, Hepatic System Disease, Immunological Disease, Neurological Disease, Renal and Urological Disease, Reproductive System Disease, Respiratory Disease, Skeletal and Muscular Disorders	cell division cycle 2, G1 to S and G2 to M	Nucleus	kinase	CDC2
3787855	LIPG	3	1.22e-11	1.74e-12	867	2.02e-12	21.8544	70.6548	3.23298	Antigen Presentation, Cardiovascular Disease, Inflammatory Response	lipase, endothelial	Extracellular Space	enzyme	LIPG
3919278	CLIC6	3	9.7e-07	6.31e-07	3777	1.35e-05	226.026	71.1107	-3.17851		chloride intracellular channel 6	Cytoplasm	ion channel	CLIC6
3595979	CCNB2	3	0.000110875	0.000109545	1371	4.18e-07	32.3104	71.3281	2.20759	Cancer, Gastrointestinal Disease, Genetic Disorder, Respiratory Disease	cyclin B2	Cytoplasm	other	CCNB2
2364438	NUF2	3	2.3e-06	2.01e-06	1051	2.73e-10	26.2119	71.7787	2.7384	Cancer, Reproductive System Disease	NUF2, NDC80 kinetochore complex component, homolog (S. cerevisiae)	Nucleus	other	NUF2
2333136	CDC20	3	1.55e-06	1.24e-06	1381	5.13e-07	29.1431	72.7649	2.49681	Cancer, Connective Tissue Disorders, Gastrointestinal Disease, Genetic Disorder, Hematological Disease, Inflammatory Disease, Reproductive System Disease, Respiratory Disease	cell division cycle 20 homolog (S. cerevisiae)	Nucleus	other	CDC20
2425756	COL11A1	3	0.00220858	0.00187184	1041	2.12e-10	13.5894	77.2306	5.68316	Connective Tissue Disorders, Dermatological Diseases and Conditions, Developmental Disorder, Genetic Disorder, Inflammatory Disease, Ophthalmic Disease, Skeletal and Muscular Disorders	collagen, type XI, alpha 1	Extracellular Space	other	COL11A1
3868783	KLK7	3	0.00406192	0.00366212	1520	7.55e-06	19.8228	78.3642	3.95323		kallikrein-related peptidase 7	Extracellular Space	peptidase	KLK7
2633737	GPR128	3	0.00771451	0.00769993	1613	3.9e-05	46.6699	84.6719	1.81427		G protein-coupled receptor 128	Plasma Membrane	G-protein coupled receptor	GPR128
2648074	AADAC	3	1.26e-05	1.14e-05	3899	1.37e-06	219.098	90.34	-2.42526	Cancer, Hepatic System Disease	arylacetamide deacetylase (esterase)	Cytoplasm	enzyme	AADAC
3863214	cdna(scan)	3	0.000164403	0.000119491	1558	1.5e-05	18.4654	93.1659	5.04544
2397732	AGMAT	3	8.96e-07	7.89e-07	1307	1.09e-07	43.961	93.4035	2.12469		agmatine ureohydrolase (agmatinase)	Cytoplasm	enzyme	AGMAT
3504617	C13orf3	3	3.07e-08	1.3e-08	1107	1.1e-09	32.1597	93.995	2.92276
3852565	ASF1B	3	1.23e-07	8.35e-08	1248	2.99e-08	42.3297	105.644	2.49574		ASF1 anti-silencing function 1 homolog B (S. cerevisiae)	Nucleus	other	ASF1B
2376548	MFSD4	3	8.29e-09	1.95e-09	4230	9.05e-10	480.104	106.538	-4.5064		major facilitator superfamily domain containing 4	Unknown	other	MFSD4
3258444	CEP55	3	3.07e-08	1.36e-08	1071	4.52e-10	37.1564	111.883	3.01113	Cancer, Gastrointestinal Disease, Genetic Disorder	centrosomal protein 55kDa	Unknown	other	CEP55
3666366	CDH3	3	0.000168095	0.000121615	945	1.72e-11	30.264	114.97	3.79891	Cancer, Endocrine System Disorders, Gastrointestinal Disease, Genetic Disorder, Reproductive System Disease	cadherin 3, type 1, P-cadherin (placental)	Plasma Membrane	other	CDH3
2438458	CRABP2	3	1.29e-07	4.16e-08	991	5.83e-11	30.2717	116.285	3.84137	Cancer, Gastrointestinal Disease, Reproductive System Disease, Skeletal and Muscular Disorders	cellular retinoic acid binding protein 2	Cytoplasm	transporter	CRABP2
2884727	ATP10B	3	1.9e-05	1.47e-05	1786	0.000589502	53.9748	119.533	2.21461		ATPase, class V, type 10B	Plasma Membrane	transporter	ATP10B
2889916	ADAMTS2	3	2.91e-08	9.9e-09	1074	4.87e-10	44.3244	121.519	2.74159	Connective Tissue Disorders, Dermatological Diseases and Conditions, Genetic Disorder, Inflammatory Disease, Skeletal and Muscular Disorders	ADAM metallopeptidase with thrombospondin type 1 motif, 2	Extracellular Space	peptidase	ADAMTS2
3178583	CKS2	3	0.000389806	0.000389475	1295	8.41e-08	56.6393	124.737	2.2023	Cancer, Genetic Disorder, Respiratory Disease, Skeletal and Muscular Disorders	CDC28 protein kinase regulatory subunit 2	Unknown	kinase	CKS2
3168508	MELK	3	2.21e-06	2.07e-06	1139	2.39e-09	54.8384	127.022	2.3163	Cancer, Gastrointestinal Disease, Genetic Disorder	maternal embryonic leucine zipper kinase	Cytoplasm	kinase	MELK
3312490	MKI67	3	1.63e-07	1.49e-07	1025	1.41e-10	50.9324	132.768	2.60675	Cancer, Gastrointestinal Disease, Organismal Injury and Abnormalities, Renal and Urological Disease, Reproductive System Disease	antigen identified by monoclonal antibody Ki-67	Nucleus	other	MKI67
2997376	ANLN	3	1.53e-08	9.23e-09	1104	1.02e-09	49.6499	140.74	2.83465	Cancer, Reproductive System Disease	anillin, actin binding protein	Cytoplasm	other	ANLN
3728964	PRR11	3	0.000640491	0.000522684	1063	3.7e-10	48.1303	142.59	2.96259		proline rich 11	Unknown	other	PRR11
3988165	SLC6A14	3	0.00163227	0.00155908	1736	0.000281131	73.1428	147.194	2.01242	Genetic Disorder, Nutritional Disease	solute carrier family 6 (amino acid transporter), member 14	Plasma Membrane	transporter	SLC6A14
3643396	MSLN	3	0.00442745	0.00388763	1243	2.67e-08	27.0368	148.647	5.49796	Cancer, Gastrointestinal Disease, Genetic Disorder, Reproductive System Disease, Respiratory Disease	mesothelin	Extracellular Space	other	MSLN
3653072	PLK1	3	1.92e-08	1.4e-08	1095	8.21e-10	56.7573	151.573	2.67054	Cancer, Dermatological Diseases and Conditions, Gastrointestinal Disease, Genetic Disorder, Hepatic System Disease, Renal and Urological Disease, Reproductive System Disease, Respiratory Disease	polo-like kinase 1 (Drosophila)	Nucleus	kinase	PLK1
2798915	TRIP13	3	1.9e-05	1.15e-05	1069	4.3e-10	45.3941	157.064	3.46002	Cancer, Gastrointestinal Disease, Genetic Disorder	thyroid hormone receptor interactor 13	Cytoplasm	transcription regulator	TRIP13
2926802	MYB	3	5.39e-06	4.48e-06	1248	2.99e-08	56.9328	157.489	2.76622	Cancer, Cardiovascular Disease, Gastrointestinal Disease, Hematological Disease, Immunological Disease, Inflammatory Response, Organismal Injury and Abnormalities, Reproductive System Disease, Skeletal and Muscular Disorders	v-myb myeloblastosis viral oncogene homolog (avian)	Nucleus	transcription regulator	MYB
2451200	UBE2T	3	7.62e-08	3.76e-08	1214	1.39e-08	58.5303	164.78	2.81529		ubiquitin-conjugating enzyme E2T (putative)	Unknown	enzyme	UBE2T
3622176	DUOX2	3	0.000452891	0.000392879	3358	0.00668123	353.537	167.126	-2.11539	Antigen Presentation, Antimicrobial Response, Endocrine System Disorders, Genetic Disorder, Inflammatory Response, Metabolic Disease, Organismal Injury and Abnormalities	dual oxidase 2	Unknown	enzyme	DUOX2
3047581	INHBA	3	1.57e-06	7.05e-07	824	5.95e-13	40.3848	167.402	4.14517	Antigen Presentation, Cancer, Endocrine System Disorders, Hematological Disease, Hepatic System Disease, Inflammatory Response, Reproductive System Disease, Skeletal and Muscular Disorders	inhibin, beta A	Extracellular Space	growth factor	INHBA
3720896	CDC6	3	0.00111272	0.000922764	1051	2.73e-10	46.2184	168.422	3.64404	Cancer, Gastrointestinal Disease, Genetic Disorder, Hematological Disease, Reproductive System Disease, Respiratory Disease	cell division cycle 6 homolog (S. cerevisiae)	Nucleus	other	CDC6
3662150	MT1M	3	1.43e-08	5.61e-09	4270	3.35e-10	666.546	196.428	-3.39333	Genetic Disorder, Neurological Disease	metallothionein 1M	Unknown	other	MT1M
3063589	AZGP1	3	6.21e-06	4.47e-06	3743	2.45e-05	517.449	196.911	-2.62783	Inflammatory Disease, Respiratory Disease	alpha-2-glycoprotein 1, zinc-binding	Extracellular Space	transporter	AZGP1
3748957	ALDH3A1	3	0.000199753	0.000198221	3746	2.33e-05	398.195	201.357	-1.97755	Cancer, Dermatological Diseases and Conditions, Genetic Disorder, Ophthalmic Disease, Respiratory Disease	aldehyde dehydrogenase 3 family, memberA1	Cytoplasm	enzyme	ALDH3A1
3031650	ABP1	3	0.00253126	0.00250812	1654	7.72e-05	118.151	215.803	1.8265	Cancer, Gastrointestinal Disease, Genetic Disorder, Reproductive System Disease	amiloride binding protein 1 (amine oxidase (copper-containing))	Extracellular Space	enzyme	ABP1
2703462	C3orf57	3	3.07e-05	2.55e-05	3583	0.000326949	589.141	240.126	-2.45346
2946219	HIST1H2AB	3	0.000123304	0.000113561	1550	1.3e-05	112.744	240.575	2.13382		histone cluster 1, H2ab	Nucleus	other	HIST1H2AB
3881443	TPX2	3	7.11e-08	6.11e-08	1034	1.77e-10	86.5876	243.598	2.81331		TPX2, microtubule-associated, homolog (Xenopus laevis)	Nucleus	other	TPX2
3415320	KRT7	3	0.000224162	0.00015792	1260	3.9e-08	45.0239	247.51	5.49729	Cancer, Gastrointestinal Disease, Genetic Disorder, Reproductive System Disease	keratin 7	Cytoplasm	other	KRT7
2366798	PRRX1	3	7.47e-06	5.98e-06	1472	3.08e-06	103.52	256.252	2.47538	Cancer, Gastrointestinal Disease, Skeletal and Muscular Disorders	paired related homeobox 1	Nucleus	transcription regulator	PRRX1
2443120	DPT	3	4.57e-07	2.74e-07	4179	3.11e-09	789.258	295.918	-2.66715	Cancer, Reproductive System Disease	dermatopontin	Extracellular Space	other	DPT
2633390	COL8A1	3	1.49e-08	5.49e-09	1073	4.75e-10	97.0603	308.387	3.17727	Dermatological Diseases and Conditions	collagen, type VIII, alpha 1	Extracellular Space	other	COL8A1
3986346	CLDN2	3	0.00051701	0.0004082	1425	1.24e-06	66.6063	308.809	4.63633		claudin 2	Plasma Membrane	other	CLDN2
3396084	VSIG2	3	1.91e-10	8.94e-11	4134	8.95e-09	888.039	332.057	-2.67436		V-set and immunoglobulin domain containing 2	Plasma Membrane	other	VSIG2
3025433	tcag7.1260	3	1.01e-06	9.12e-07	3926	8e-07	816.757	341.076	-2.39465
2961177	COL12A1	3	1.2e-07	7.48e-08	1079	5.52e-10	138.378	346.959	2.50732	Cancer, Dermatological Diseases and Conditions	collagen, type XII, alpha 1	Extracellular Space	other	COL12A1
3394412	THY1	3	8.06e-11	2.73e-11	919	8.51e-12	110.152	347.991	3.15919	Antigen Presentation, Cancer, Cardiovascular Disease, Endocrine System Disorders, Genetic Disorder, Hematological Disease, Hypersensitivity Response, Immunological Disease, Inflammatory Response, Metabolic Disease, Neurological Disease, Renal and Urological Disease, Reproductive System Disease	Thy-1 cell surface antigen	Plasma Membrane	other	THY1
3756193	TOP2A	3	9.42e-05	6.76e-05	1060	3.43e-10	105.275	373.95	3.55214	Antigen Presentation, Cancer, Dermatological Diseases and Conditions, Gastrointestinal Disease, Genetic Disorder, Hematological Disease, Hepatic System Disease, Immunological Disease, Infectious Disease, Inflammatory Disease, Inflammatory Response, Neurological Disease, Ophthalmic Disease, Renal and Urological Disease, Reproductive System Disease, Respiratory Disease, Skeletal and Muscular Disord…	topoisomerase (DNA) II alpha 170kDa	Nucleus	enzyme	TOP2A
3868681	KLK1	3	0.00086482	0.000789479	1826	0.00103865	182.001	409.496	2.24997	Organismal Injury and Abnormalities, Renal and Urological Disease	kallikrein 1	Unknown	peptidase	KLK1
3863640	CXCL17	3	7.12e-09	3.63e-09	3970	3.26e-07	1214.35	455.849	-2.66393	Antigen Presentation, Inflammatory Response	chemokine (C-X-C motif) ligand 17	Unknown	other	CXCL17
3102372	SULF1	3	5.25e-10	2.46e-10	989	5.54e-11	153.283	462.72	3.01872	Cancer, Reproductive System Disease	sulfatase 1	Cytoplasm	enzyme	SULF1
3388673	MMP7	3	0.000397515	0.000328178	1325	1.6e-07	131.246	512.937	3.90822	Antigen Presentation, Cancer, Cardiovascular Disease, Connective Tissue Disorders, Dermatological Diseases and Conditions, Developmental Disorder, Endocrine System Disorders, Gastrointestinal Disease, Genetic Disorder, Hematological Disease, Hepatic System Disease, Inflammatory Disease, Inflammatory Response, Organismal Injury and Abnormalities, Reproductive System Disease, Respiratory Disease	matrix metallopeptidase 7 (matrilysin, uterine)	Extracellular Space	peptidase	MMP7
3692999	MT1G	3	3.1e-08	1.68e-08	4064	4.36e-08	2338.87	883.87	-2.64617	Genetic Disorder, Neurological Disease, Reproductive System Disease	metallothionein 1G	Cytoplasm	other	MT1G
2970942	COL10A1	3	0.000261891	0.000191141	817	4.87e-13	137.968	934.564	6.77378	Connective Tissue Disorders, Dermatological Diseases and Conditions, Inflammatory Disease, Skeletal and Muscular Disorders	collagen, type X, alpha 1	Extracellular Space	other	COL10A1
2431066	REG4	3	0.00365245	0.00353478	1867	0.00181236	566.626	1260.81	2.22511		regenerating islet-derived family, member 4	Extracellular Space	other	REG4
3933550	TFF2	3	5.66e-07	5.56e-07	4055	5.32e-08	2913.17	1288.52	-2.26086	Cancer, Gastrointestinal Disease, Renal and Urological Disease	trefoil factor 2	Extracellular Space	other	TFF2
2487063	GKN1	3	6.04e-10	5.23e-10	4157	5.23e-09	4066.34	1516.29	-2.68176		gastrokine 1	Extracellular Space	growth factor	GKN1
2557956	GKN2	3	3.65e-09	3.5e-09	4106	1.7e-08	4967.81	2092.34	-2.37428		gastrokine 2	Extracellular Space	other	GKN2
3762198	COL1A1	3	1.02e-10	1.91e-11	843	1.02e-12	669.374	2365.62	3.53407	Antigen Presentation, Auditory Disease, Cancer, Cardiovascular Disease, Connective Tissue Disorders, Dermatological Diseases and Conditions, Developmental Disorder, Gastrointestinal Disease, Genetic Disorder, Hepatic System Disease, Inflammatory Response, Organismal Injury and Abnormalities, Skeletal and Muscular Disorders	collagen, type I, alpha 1	Extracellular Space	other	COL1A1
3662130	MT1L	2	0.00415733	0.00414573	3515	0.000878462	17.1955	10.2256	-1.6816	Genetic Disorder, Neurological Disease	metallothionein 1L (gene/pseudogene)	Cytoplasm	other	MT1L
2812591	FLJ46010	2	0.0268895	0.0268778	3275	0.0169645	14.0318	10.244	-1.36975
2772341	UGT2B4	2	0.00815746	0.00808985	1375	4.53e-07	6.26805	10.9271	1.7433		UDP glucuronosyltransferase 2 family, polypeptide B4	Cytoplasm	enzyme	UGT2B4
2465395	ZNF695	2	0.00106386	0.00106383	1677	0.000111997	6.97473	11.1023	1.59179		zinc finger protein 695	Nucleus	other	ZNF695
2853426	RANBP3L	2	0.000163501	0.000161401	3851	3.45e-06	19.7953	11.1727	-1.77175		RAN binding protein 3-like	Unknown	other	RANBP3L
3868257	SIGLEC11	2	1.47e-07	9.48e-08	4309	1.24e-10	36.0836	11.289	-3.19636		sialic acid binding Ig-like lectin 11	Plasma Membrane	other	SIGLEC11
2339454	ANGPTL3	2	9.84e-05	9.67e-05	4041	7.22e-08	27.5418	11.7534	-2.3433		angiopoietin-like 3	Extracellular Space	other	ANGPTL3
2958117	HMGCLL1	2	0.00522227	0.00512389	3293	0.0139742	17.7134	11.878	-1.49128		3-hydroxymethyl-3-methylglutaryl-Coenzyme A lyase-like 1	Unknown	enzyme	HMGCLL1
3106559	SLC26A7	2	5.41e-07	2.45e-07	4107	1.66e-08	33.647	12.017	-2.79995		solute carrier family 26, member 7	Plasma Membrane	transporter	SLC26A7
2632778	EPHA6	2	0.0201812	0.0200757	3427	0.0028601	21.098	12.9142	-1.63371		EPH receptor A6	Plasma Membrane	kinase	EPHA6
3292169	CTNNA3	2	0.00530469	0.00486156	3577	0.000357702	32.5454	12.9985	-2.50378	Cancer, Gastrointestinal Disease	catenin (cadherin-associated protein), alpha 3	Plasma Membrane	other	CTNNA3
3369366	SLC1A2	2	4.86e-06	3.31e-06	4140	7.79e-09	38.7059	13.359	-2.89736	Cancer, Connective Tissue Disorders, Dermatological Diseases and Conditions, Genetic Disorder, Immunological Disease, Inflammatory Disease, Neurological Disease, Psychological Disorders, Skeletal and Muscular Disorders	solute carrier family 1 (glial high affinity glutamate transporter), member 2	Plasma Membrane	transporter	SLC1A2
2896848	RBM24	2	0.0215517	0.0207797	3332	0.00903921	27.8226	15.4355	-1.8025		RNA binding motif protein 24	Unknown	other	RBM24
3451960	cdna(scan)	2	0.00163073	0.00153978	1947	0.00501199	8.69893	15.8439	1.82136
3721619	HSPB9	2	9.47e-06	7.49e-06	3835	4.67e-06	38.3902	16.4356	-2.3358		heat shock protein, alpha-crystallin-related, B9	Unknown	other	HSPB9
3841901	NLRP2	2	0.0178131	0.0175854	2066.5	0.0193585	10.6656	16.8737	1.58207	Genetic Disorder, Immunological Disease	NLR family, pyrin domain containing 2	Nucleus	other	NLRP2
2957314	GSTA2	2	0.0174638	0.0169049	3288	0.0147542	38.4052	16.9118	-2.27091	Cancer, Genetic Disorder, Hematological Disease, Hepatic System Disease	glutathione S-transferase A2	Cytoplasm	enzyme	GSTA2
3335885	BANF1	2	0.000213692	0.000213014	1530	9.06e-06	9.89455	17.2364	1.74201	Antigen Presentation, Antimicrobial Response, Infection Mechanism, Inflammatory Response	barrier to autointegration factor 1	Nucleus	other	BANF1
4026075	GABRA3	2	0.00170301	0.00146752	2060	0.0180792	5.27393	17.3477	3.28934	Cancer, Cardiovascular Disease, Developmental Disorder, Genetic Disorder, Infectious Disease, Neurological Disease, Nutritional Disease, Organismal Injury and Abnormalities, Psychological Disorders, Respiratory Disease, Skeletal and Muscular Disorders	gamma-aminobutyric acid (GABA) A receptor, alpha 3	Plasma Membrane	ion channel	GABRA3
2906591	APOBEC2	2	6.73e-08	2.22e-08	4269	3.43e-10	60.7767	17.7459	-3.42484		apolipoprotein B mRNA editing enzyme, catalytic polypeptide-like 2	Unknown	enzyme	APOBEC2
2939886		2	0.00591913	0.00567502	2078	0.0218168	10.7013	17.8286	1.66602
2726542	FLJ21511	2	2.26e-07	8.84e-08	4026	1e-07	52.7021	18.0255	-2.92376
3135156	FAM150A	2	0.00693349	0.00625379	1726	0.000241383	6.88297	18.0458	2.62181		family with sequence similarity 150, member A	Unknown	other	FAM150A
2597347	ACADL	2	0.00631757	0.00625113	4125	1.1e-08	30.1377	18.2811	-1.64857	Endocrine System Disorders, Genetic Disorder, Metabolic Disease	acyl-Coenzyme A dehydrogenase, long chain	Cytoplasm	enzyme	ACADL
3549517	OTUB2	2	0.000141734	0.000120575	1774	0.000495151	9.4574	18.302	1.9352		OTU domain, ubiquitin aldehyde binding 2	Unknown	enzyme	OTUB2
3761551	TTLL6	2	0.00165968	0.00146858	1831	0.00111305	8.55197	18.515	2.165		tubulin tyrosine ligase-like family, member 6	Unknown	enzyme	TTLL6
2521239	FLJ39660	2	2.84e-05	2.63e-05	1275	5.44e-08	8.63489	18.6506	2.15992
3587226	CHRNA7	2	0.0442806	0.044252	3445	0.00226689	25.7907	18.6758	-1.38097	Antigen Presentation, Cancer, Cardiovascular Disease, Endocrine System Disorders, Gastrointestinal Disease, Genetic Disorder, Hematological Disease, Hepatic System Disease, Inflammatory Response, Metabolic Disease, Neurological Disease, Ophthalmic Disease, Psychological Disorders, Renal and Urological Disease, Reproductive System Disease, Respiratory Disease	cholinergic receptor, nicotinic, alpha 7	Plasma Membrane	transmembrane receptor	CHRNA7
3318639	CCKBR	2	2.01e-08	5.09e-09	4251	5.39e-10	84.7069	19.2381	-4.40307	Cancer, Connective Tissue Disorders, Developmental Disorder, Endocrine System Disorders, Gastrointestinal Disease, Genetic Disorder, Metabolic Disease, Neurological Disease, Nutritional Disease, Organismal Injury and Abnormalities, Psychological Disorders, Renal and Urological Disease	cholecystokinin B receptor	Plasma Membrane	G-protein coupled receptor	CCKBR
3416278	HOXC11	2	0.00019544	0.00014325	1595	2.86e-05	7.19139	19.7959	2.75272		homeobox C11	Nucleus	transcription regulator	HOXC11
3985008	TCEAL2	2	0.00462891	0.00445558	3577	0.000357702	33.4618	20.288	-1.64934		transcription elongation factor A (SII)-like 2	Unknown	other	TCEAL2
3833967	CYP2F1	2	0.0385564	0.0385341	3190	0.0398989	29.8185	20.8609	-1.4294	Respiratory Disease	cytochrome P450, family 2, subfamily F, polypeptide 1	Cytoplasm	enzyme	CYP2F1
2417528	DEPDC1	2	0.000383912	0.000382043	1364	3.62e-07	10.3601	21.2187	2.0481		DEP domain containing 1	Unknown	other	DEPDC1
3461105	IFNG	2	0.00766599	0.00743787	1740	0.000298684	11.2058	21.7705	1.94279	Antigen Presentation, Antimicrobial Response, Cancer, Cardiovascular Disease, Connective Tissue Disorders, Dermatological Diseases and Conditions, Endocrine System Disorders, Gastrointestinal Disease, Genetic Disorder, Hematological Disease, Hepatic System Disease, Hypersensitivity Response, Immunological Disease, Infection Mechanism, Infectious Disease, Inflammatory Disease, Inflammatory Respons…	interferon, gamma	Extracellular Space	cytokine	IFNG
2769095	cdna(scan)	2	0.00178206	0.00176552	1794	0.000661427	10.9613	21.9507	2.00256
3817933	ZNRF4	2	8.11e-07	5.67e-07	3846	3.79e-06	63.1284	21.9559	-2.87524		zinc and ring finger 4	Unknown	other	ZNRF4
3407629	SLCO1B3	2	0.00680075	0.00610281	1638	5.93e-05	4.15459	22.0098	5.29771	Cancer, Gastrointestinal Disease, Hepatic System Disease, Infectious Disease	solute carrier organic anion transporter family, member 1B3	Plasma Membrane	transporter	SLCO1B3
2855614	C5orf34	2	1.15e-06	8.66e-07	1211	1.29e-08	10.5509	22.2262	2.10657
2519038	FSIP2	2	6.71e-06	5.57e-06	3873	2.27e-06	56.378	22.3456	-2.523		fibrous sheath interacting protein 2	Unknown	other	FSIP2
2911226	C6orf65	2	0.000504233	0.000452843	1838	0.0012255	12.3262	23.0923	1.87344
2967276	POPDC3	2	0.000207332	0.000167627	3609	0.000220132	59.2838	23.2763	-2.54695		popeye domain containing 3	Unknown	other	POPDC3
3757213	KRT17	2	0.00122535	0.00103214	2039.5	0.0145161	10.1189	24.087	2.3804	Dermatological Diseases and Conditions, Developmental Disorder, Genetic Disorder, Neurological Disease	keratin 17	Cytoplasm	other	KRT17
3239437	GPR158	2	0.000182729	0.000142141	1738	0.000289783	9.41901	24.5531	2.60676		G protein-coupled receptor 158	Plasma Membrane	G-protein coupled receptor	GPR158
2780907	DKK2	2	5.39e-05	4.64e-05	1342	2.29e-07	13.2127	24.8535	1.88102	Skeletal and Muscular Disorders	dickkopf homolog 2 (Xenopus laevis)	Extracellular Space	other	DKK2
2518729	DUSP19	2	2.02e-07	1.04e-07	3875	2.18e-06	56.4443	24.9571	-2.26166	Cancer, Reproductive System Disease	dual specificity phosphatase 19	Cytoplasm	phosphatase	DUSP19
2375338		2	0.032258	0.0320509	1886	0.00232673	17.4127	25.0196	1.43686
2736462	BMPR1B	2	0.000642387	0.000641606	3840	4.25e-06	42.5387	25.158	-1.69086	Cancer, Cardiovascular Disease, Connective Tissue Disorders, Developmental Disorder, Genetic Disorder, Neurological Disease, Organismal Injury and Abnormalities, Reproductive System Disease, Respiratory Disease, Skeletal and Muscular Disorders	bone morphogenetic protein receptor, type IB	Plasma Membrane	kinase	BMPR1B
3101475	DNAJC5B	2	0.00407666	0.00400424	1903	0.00289688	17.2555	25.4779	1.47651		DnaJ (Hsp40) homolog, subfamily C, member 5 beta	Unknown	transporter	DNAJC5B
2620256	KIF15	2	7.69e-05	7.39e-05	1330	1.78e-07	11.6988	25.6108	2.18919		kinesin family member 15	Nucleus	other	KIF15
2406420	CLSPN	2	0.00248162	0.00246576	1152	3.26e-09	13.1235	25.7565	1.96262		claspin homolog (Xenopus laevis)	Nucleus	other	CLSPN
2711225	ATP13A4	2	0.000146507	0.000146189	3923	8.49e-07	47.5869	26.3545	-1.80565		ATPase type 13A4	Unknown	transporter	ATP13A4
4000370	FANCB	2	0.000241343	0.00023819	1234	2.18e-08	12.9492	27.3966	2.1157	Developmental Disorder, Genetic Disorder, Hematological Disease	Fanconi anemia, complementation group B	Nucleus	other	FANCB
2961647	HTR1B	2	3.21e-05	2.98e-05	3749	2.21e-05	53.4073	27.5095	-1.94141	Genetic Disorder, Neurological Disease, Nutritional Disease, Organismal Injury and Abnormalities, Psychological Disorders	5-hydroxytryptamine (serotonin) receptor 1B	Plasma Membrane	G-protein coupled receptor	HTR1B
2842157	HRH2	2	2.71e-05	2.26e-05	3680	7.11e-05	51.8828	27.7541	-1.86938	Antigen Presentation, Cancer, Dermatological Diseases and Conditions, Developmental Disorder, Gastrointestinal Disease, Genetic Disorder, Immunological Disease, Infectious Disease, Inflammatory Disease, Inflammatory Response, Neurological Disease, Organismal Injury and Abnormalities, Psychological Disorders, Reproductive System Disease, Respiratory Disease	histamine receptor H2	Plasma Membrane	G-protein coupled receptor	HRH2
3889833	DOK5	2	0.000119388	0.000103339	1759	0.000396994	14.823	28.1872	1.90159		docking protein 5	Plasma Membrane	other	DOK5
2351004	GSTM5	2	0.00501437	0.00493731	3471	0.00160719	48.5224	28.319	-1.71342	Cancer, Reproductive System Disease	glutathione S-transferase M5	Cytoplasm	enzyme	GSTM5
2731513	EREG	2	0.0017954	0.00169859	1772	0.000480867	15.4059	28.4486	1.8466	Antigen Presentation, Cancer, Dermatological Diseases and Conditions, Gastrointestinal Disease, Inflammatory Disease, Inflammatory Response	epiregulin	Extracellular Space	growth factor	EREG
2946681	HIST1H2BJ	2	9.68e-05	9.19e-05	1496	4.84e-06	13.079	28.5448	2.1825		histone cluster 1, H2bj	Nucleus	other	HIST1H2BJ
3590086	RAD51	2	7.01e-05	6.78e-05	1393	6.54e-07	14.2266	28.6716	2.01535	Cancer, Gastrointestinal Disease, Genetic Disorder, Immunological Disease, Reproductive System Disease	RAD51 homolog (RecA homolog, E. coli) (S. cerevisiae)	Nucleus	enzyme	RAD51
3041816	DFNA5	2	0.000544968	0.000534096	1639	6.03e-05	17.617	28.6766	1.62778	Auditory Disease, Genetic Disorder, Neurological Disease	deafness, autosomal dominant 5	Unknown	other	DFNA5
2749011	TDO2	2	6.83e-05	6.06e-05	1299.5	9.27e-08	12.5343	28.7212	2.29141	Cancer, Gastrointestinal Disease, Hepatic System Disease, Inflammatory Disease	tryptophan 2,3-dioxygenase	Cytoplasm	enzyme	TDO2
3817698	UHRF1	2	0.00022338	0.000210632	1294	8.23e-08	13.0464	28.7241	2.20169	Cancer, Reproductive System Disease, Respiratory Disease	ubiquitin-like with PHD and ring finger domains 1	Nucleus	transcription regulator	UHRF1
3064361	ACHE	2	0.000621394	0.00051688	1624	4.69e-05	11.489	28.8739	2.51317	Antigen Presentation, Cancer, Cardiovascular Disease, Developmental Disorder, Endocrine System Disorders, Gastrointestinal Disease, Genetic Disorder, Hematological Disease, Immunological Disease, Inflammatory Response, Metabolic Disease, Neurological Disease, Ophthalmic Disease, Organismal Injury and Abnormalities, Psychological Disorders, Skeletal and Muscular Disorders	acetylcholinesterase (Yt blood group)	Plasma Membrane	enzyme	ACHE
3711869	ADORA2B	2	0.000172174	0.000138884	1508	6.05e-06	11.1736	29.1358	2.60756	Antigen Presentation, Cancer, Cardiovascular Disease, Endocrine System Disorders, Genetic Disorder, Hematological Disease, Inflammatory Disease, Inflammatory Response, Metabolic Disease, Respiratory Disease	adenosine A2b receptor	Plasma Membrane	G-protein coupled receptor	ADORA2B
2780172	CENPE	2	7.47e-06	6.64e-06	1310	1.16e-07	14.2503	29.4096	2.06379	Cancer, Reproductive System Disease	centromere protein E, 312kDa	Nucleus	other	CENPE
3763390	TMEM100	2	0.00364586	0.00349845	3703	4.85e-05	50.0278	29.4698	-1.69759		transmembrane protein 100	Unknown	other	TMEM100
3863723	CEACAM8	2	0.000773871	0.00064737	1799	0.000710439	12.7512	29.7439	2.33263	Antigen Presentation, Infectious Disease, Inflammatory Response, Respiratory Disease	carcinoembryonic antigen-related cell adhesion molecule 8	Plasma Membrane	other	CEACAM8
2748163	MND1	2	0.0339023	0.0338403	1489	4.25e-06	18.6861	29.8383	1.59681		meiotic nuclear divisions 1 homolog (S. cerevisiae)	Nucleus	other	MND1
2941476	TFAP2A	2	3.23e-06	1.69e-06	1335	1.98e-07	11.4233	30.7527	2.69212	Cancer, Connective Tissue Disorders, Dermatological Diseases and Conditions, Endocrine System Disorders, Genetic Disorder, Reproductive System Disease	transcription factor AP-2 alpha (activating enhancer binding protein 2 alpha)	Nucleus	transcription regulator	TFAP2A
3483093	PDX1	2	0.0347304	0.0341936	1918.5	0.00352498	17.0448	30.7594	1.80462	Cancer, Developmental Disorder, Endocrine System Disorders, Genetic Disorder, Hepatic System Disease, Infection Mechanism, Inflammatory Disease, Metabolic Disease	pancreatic and duodenal homeobox 1	Nucleus	transcription regulator	PDX1
3411810	PDZRN4	2	0.00130185	0.00118509	3381	0.00507321	62.4906	30.7672	-2.03108		PDZ domain containing ring finger 4	Unknown	other	PDZRN4
3852381	PODNL1	2	1.37e-08	4.01e-09	1127	1.79e-09	10.7773	30.8002	2.85787		podocan-like 1	Unknown	other	PODNL1
2444283	TNFSF4	2	3.38e-05	2.62e-05	1474	3.2e-06	14.8881	30.9772	2.08067	Antigen Presentation, Cardiovascular Disease, Connective Tissue Disorders, Endocrine System Disorders, Genetic Disorder, Hematological Disease, Immunological Disease, Infection Mechanism, Infectious Disease, Inflammatory Disease, Inflammatory Response, Metabolic Disease, Neurological Disease, Organismal Injury and Abnormalities, Skeletal and Muscular Disorders	tumor necrosis factor (ligand) superfamily, member 4	Extracellular Space	cytokine	TNFSF4
3377016	PYGM	2	0.0148844	0.0145977	3291	0.0142817	47.8571	31.2784	-1.53004	Genetic Disorder, Hematological Disease, Metabolic Disease, Respiratory Disease	phosphorylase, glycogen, muscle	Unknown	enzyme	PYGM
4012511	NAP1L2	2	0.0486605	0.0483982	3231	0.0267419	44.6116	31.2934	-1.42559	Cancer, Gastrointestinal Disease, Genetic Disorder	nucleosome assembly protein 1-like 2	Nucleus	other	NAP1L2
3212420	SLC28A3	2	0.0134817	0.0130495	1592	2.72e-05	16.4139	31.4659	1.91703		solute carrier family 28 (sodium-coupled nucleoside transporter), member 3	Plasma Membrane	transporter	SLC28A3
3399678	B3GAT1	2	2.85e-07	1.09e-07	3964	3.69e-07	142.84	31.4966	-4.53509		beta-1,3-glucuronyltransferase 1 (glucuronosyltransferase P)	Cytoplasm	enzyme	B3GAT1
2546795	CAPN13	2	1.04e-07	6.48e-08	3982	2.54e-07	67.4897	31.7514	-2.12557		calpain 13	Unknown	other	CAPN13
3291435	RTKN2	2	2.24e-08	1.01e-08	1072	4.64e-10	12.3927	32.3512	2.6105		rhotekin 2	Plasma Membrane	other	RTKN2
3121198	C8orf42	2	0.0211813	0.021143	3291	0.0142817	46.1008	32.3802	-1.42373
3527722	RNASE2	2	0.00121288	0.00117583	1804	0.000762808	16.3691	32.4387	1.9817	Antigen Presentation, Hematological Disease, Infectious Disease, Inflammatory Response, Neurological Disease, Respiratory Disease	ribonuclease, RNase A family, 2 (liver, eosinophil-derived neurotoxin)	Extracellular Space	enzyme	RNASE2
3706659	ASPA	2	0.00884737	0.00878859	3763	1.73e-05	50.26	32.8322	-1.53082	Genetic Disorder, Neurological Disease	aspartoacylase (Canavan disease)	Unknown	enzyme	ASPA
2783715	MAD2L1	2	0.000292745	0.000288037	1545	1.19e-05	15.6549	32.9467	2.10457	Cancer, Gastrointestinal Disease, Genetic Disorder, Immunological Disease, Reproductive System Disease	MAD2 mitotic arrest deficient-like 1 (yeast)	Nucleus	other	MAD2L1
3360417	HBD	2	0.00748098	0.00746409	3530	0.000710439	54.2073	33.5414	-1.61613	Cancer, Genetic Disorder, Hematological Disease, Skeletal and Muscular Disorders	hemoglobin, delta	Cytoplasm	transporter	HBD
3955940	CRYBB1	2	1.85e-08	7.79e-09	4137	8.35e-09	106.224	33.7438	-3.14797	Genetic Disorder, Ophthalmic Disease	crystallin, beta B1	Unknown	other	CRYBB1
2824581	KCNN2	2	0.000611127	0.000530174	3804	8.28e-06	85.3711	33.8115	-2.52491		potassium intermediate/small conductance calcium-activated channel, subfamily N, member 2	Plasma Membrane	ion channel	KCNN2
3658925	ORC6L	2	0.00158901	0.00157276	1328	1.7e-07	16.8587	34.0519	2.01984		origin recognition complex, subunit 6 like (yeast)	Nucleus	other	ORC6L
2818035	CKMT2	2	1.13e-10	1.54e-11	4418	6.84e-12	122.498	34.273	-3.57418		creatine kinase, mitochondrial 2 (sarcomeric)	Cytoplasm	kinase	CKMT2
2966232	COQ3	2	1.39e-07	5.01e-08	3956	4.35e-07	99.7205	34.2768	-2.90927		coenzyme Q3 homolog, methyltransferase (S. cerevisiae)	Cytoplasm	enzyme	COQ3
3722770	C17orf53	2	6.08e-06	5.21e-06	1331	1.82e-07	17.9802	34.5793	1.92319
2775994	HPSE	2	1.86e-06	1.76e-06	1282	6.34e-08	20.6243	34.6501	1.68006	Cancer, Cardiovascular Disease, Dermatological Diseases and Conditions, Endocrine System Disorders, Gastrointestinal Disease, Hepatic System Disease, Immunological Disease, Neurological Disease, Reproductive System Disease	heparanase	Plasma Membrane	enzyme	HPSE
3516639	PCDH9	2	0.034607	0.0346041	3597	0.000264547	49.2031	34.7219	-1.41706		protocadherin 9	Plasma Membrane	other	PCDH9
2987038	GPER	2	1.03e-06	4.51e-07	4441	3.63e-12	102.564	34.7671	-2.95002	Cancer, Reproductive System Disease	G protein-coupled estrogen receptor 1	Plasma Membrane	G-protein coupled receptor	GPER
3515965	DIAPH3	2	5.59e-06	5.34e-06	1086	6.57e-10	16.5245	35.0574	2.12154	Cancer, Skeletal and Muscular Disorders	diaphanous homolog 3 (Drosophila)	Cytoplasm	enzyme	DIAPH3
2638177	NR1I2	2	0.024543	0.0244927	1997	0.00903921	22.4536	35.5316	1.58245	Antigen Presentation, Cancer, Gastrointestinal Disease, Genetic Disorder, Hepatic System Disease, Inflammatory Response, Metabolic Disease, Neurological Disease, Organismal Injury and Abnormalities, Renal and Urological Disease, Reproductive System Disease	nuclear receptor subfamily 1, group I, member 2	Nucleus	ligand-dependent nuclear receptor	NR1I2
2454661	C1orf75	2	4.79e-07	4.44e-07	1324	1.57e-07	20.0494	35.6697	1.77909
3708223	BCL6B	2	0.000294618	0.000281779	1649	7.11e-05	21.4514	35.9344	1.67516		B-cell CLL/lymphoma 6, member B (zinc finger protein)	Nucleus	transcription regulator	BCL6B
3362191	SCUBE2	2	6.06e-07	5.01e-07	3974	3e-07	74.296	36.5047	-2.03524	Cancer, Genetic Disorder, Neurological Disease, Reproductive System Disease	signal peptide, CUB domain, EGF-like 2	Unknown	other	SCUBE2
2399988	RNF186	2	0.029511	0.0290755	1690	0.000137773	23.0839	36.7432	1.59173		ring finger protein 186	Unknown	other	RNF186
2585933	SPC25	2	7.08e-05	7.05e-05	1303	1e-07	19.7781	37.0153	1.87153	Cancer, Gastrointestinal Disease, Genetic Disorder, Reproductive System Disease	SPC25, NDC80 kinetochore complex component, homolog (S. cerevisiae)	Unknown	other	SPC25
3063795	GAL3ST4	2	2.04e-08	1.13e-08	1318	1.38e-07	17.4176	37.1623	2.13361		galactose-3-O-sulfotransferase 4	Cytoplasm	enzyme	GAL3ST4
2360647	EFNA3	2	4.48e-05	3.09e-05	1261.5	4.04e-08	14.6388	37.6297	2.57055		ephrin-A3	Plasma Membrane	kinase	EFNA3
2420229	TTLL7	2	0.00288158	0.00285326	3504	0.00102433	57.7118	37.6793	-1.53166		tubulin tyrosine ligase-like family, member 7	Plasma Membrane	other	TTLL7
3101629	ADHFE1	2	4.9e-10	2.85e-10	4286	2.23e-10	91.632	37.9801	-2.41263		alcohol dehydrogenase, iron containing, 1	Unknown	enzyme	ADHFE1
3607698	C15orf42	2	9.84e-06	8.03e-06	1273	5.2e-08	16.7327	38.1159	2.27793
2473284	CENPO	2	2.85e-07	2.18e-07	1289	7.38e-08	17.555	38.2038	2.17623		centromere protein O	Unknown	other	CENPO
2392945	FLJ42875	2	1.43e-11	1.45e-12	4486	1.02e-12	114.841	38.332	-2.99595
2996563	BMPER	2	1.12e-06	1.06e-06	4061	4.66e-08	66.85	38.4137	-1.74026		BMP binding endothelial regulator	Extracellular Space	other	BMPER
3257338	MPHOSPH1	2	8.41e-06	7.44e-06	1346	2.49e-07	18.5767	38.606	2.0782
2973232	KIAA0408	2	0.00116527	0.00107137	3521	0.00080726	73.4157	38.6357	-1.9002		KIAA0408	Unknown	other	KIAA0408
3513995	DLEU2	2	0.00160355	0.00160229	1402	7.84e-07	20.6766	38.7371	1.87347	Cancer, Genetic Disorder, Hematological Disease	deleted in lymphocytic leukemia 2 (non-protein coding)	Unknown	other	DLEU2
3367338	KIF18A	2	3.5e-07	3.02e-07	988	5.39e-11	15.4436	38.7697	2.5104		kinesin family member 18A	Cytoplasm	other	KIF18A
3652902	SCNN1B	2	4.88e-07	2.52e-07	4161	4.76e-09	129.734	38.7946	-3.34412	Cardiovascular Disease, Connective Tissue Disorders, Genetic Disorder, Metabolic Disease, Organismal Injury and Abnormalities, Respiratory Disease, Skeletal and Muscular Disorders	sodium channel, nonvoltage-gated 1, beta	Plasma Membrane	ion channel	SCNN1B
3148545	RSPO2	2	0.000115462	0.000102331	3773	1.45e-05	90.6587	39.0351	-2.32249		R-spondin 2 homolog (Xenopus laevis)	Unknown	kinase	RSPO2
3411721	CNTN1	2	0.0266064	0.0264229	3353	0.00708634	65.383	39.0741	-1.67331	Neurological Disease	contactin 1	Plasma Membrane	enzyme	CNTN1
2362892	ATP1A2	2	0.00293588	0.00286965	3681	6.99e-05	74.9769	39.858	-1.8811	Cancer, Cardiovascular Disease, Dermatological Diseases and Conditions, Endocrine System Disorders, Gastrointestinal Disease, Genetic Disorder, Immunological Disease, Inflammatory Disease, Metabolic Disease, Neurological Disease, Organismal Injury and Abnormalities, Psychological Disorders	ATPase, Na+/K+ transporting, alpha 2 (+) polypeptide	Plasma Membrane	transporter	ATP1A2
3433538	TMEM118	2	9.5e-05	8.08e-05	1177	5.89e-09	18.1706	40.0854	2.20605
2412799	ORC1L	2	0.000471377	0.000434353	1265	4.36e-08	18.2254	41.2326	2.26237	Cancer, Gastrointestinal Disease, Genetic Disorder	origin recognition complex, subunit 1-like (yeast)	Nucleus	other	ORC1L
2504645	MYO7B	2	0.00427637	0.00427376	1647	6.88e-05	24.1076	41.2629	1.71161	Cancer, Gastrointestinal Disease, Genetic Disorder	myosin VIIB	Unknown	peptidase	MYO7B
3376512	HRASLS2	2	0.000428236	0.000373368	3584	0.000322071	109.217	41.7236	-2.61764		HRAS-like suppressor 2	Unknown	other	HRASLS2
3428845	C12orf48	2	1.47e-06	1.45e-06	1173	5.36e-09	20.7929	41.8442	2.01243
3644764	CCNF	2	3.11e-07	2.19e-07	1250	3.13e-08	19.8039	42.2545	2.13365		cyclin F	Nucleus	other	CCNF
3042973	HOXA11	2	1.22e-08	4.4e-09	1105	1.05e-09	15.5109	42.5271	2.74175	Genetic Disorder, Skeletal and Muscular Disorders	homeobox A11	Nucleus	transcription regulator	HOXA11
3150715	DCC1	2	0.000819751	0.000814494	1134	2.12e-09	20.1595	42.582	2.11226
3791935	SERPINB2	2	8.13e-05	5.39e-05	1464	2.64e-06	9.70137	43.0294	4.43539	Cancer, Connective Tissue Disorders, Hematological Disease, Inflammatory Disease	serpin peptidase inhibitor, clade B (ovalbumin), member 2	Extracellular Space	other	SERPINB2
3648391	TNFRSF17	2	0.0199996	0.0196717	3291	0.0142817	79.4468	43.0912	-1.84369	Antigen Presentation, Cancer, Gastrointestinal Disease, Genetic Disorder, Hematological Disease, Immunological Disease, Inflammatory Response, Reproductive System Disease	tumor necrosis factor receptor superfamily, member 17	Plasma Membrane	other	TNFRSF17
3204061	C9orf165	2	0.00075222	0.000744629	3725	3.34e-05	76.9259	43.4166	-1.77181
2545478	CGREF1	2	0.00215515	0.00206959	1527	8.58e-06	21.8837	43.6745	1.99575		cell growth regulator with EF-hand domain 1	Extracellular Space	other	CGREF1
3589697	BUB1B	2	0.00199469	0.00199121	1128	1.84e-09	21.3383	43.8508	2.05503	Cancer, Gastrointestinal Disease, Genetic Disorder, Reproductive System Disease, Respiratory Disease	BUB1 budding uninhibited by benzimidazoles 1 homolog beta (yeast)	Nucleus	kinase	BUB1B
2921872	WISP3	2	0.00134668	0.00117449	1804	0.000762808	15.0629	43.886	2.91352	Connective Tissue Disorders, Genetic Disorder, Skeletal and Muscular Disorders	WNT1 inducible signaling pathway protein 3	Extracellular Space	growth factor	WISP3
3576411	GPR68	2	0.000428106	0.000395189	1920	0.00359191	26.7565	43.9351	1.64203	Antigen Presentation, Inflammatory Response	G protein-coupled receptor 68	Plasma Membrane	G-protein coupled receptor	GPR68
3750369	NOS2A	2	0.00838684	0.00773028	1785	0.000581042	15.6442	44.0274	2.81429
2510464	TNFAIP6	2	0.00578828	0.0055114	2083	0.0229676	24.1832	44.5386	1.84172	Antigen Presentation, Connective Tissue Disorders, Genetic Disorder, Immunological Disease, Inflammatory Disease, Inflammatory Response, Organismal Injury and Abnormalities, Skeletal and Muscular Disorders	tumor necrosis factor, alpha-induced protein 6	Extracellular Space	other	TNFAIP6
3463112	E2F7	2	1.37e-08	1.14e-08	1008	9.09e-11	21.5109	44.856	2.08527		E2F transcription factor 7	Nucleus	transcription regulator	E2F7
2917825	FUT9	2	1.24e-08	7.26e-09	4176	3.34e-09	122.31	44.9221	-2.72271		fucosyltransferase 9 (alpha (1,3) fucosyltransferase)	Cytoplasm	enzyme	FUT9
3944826	SH3BP1	2	6.81e-08	6.33e-08	1212	1.32e-08	24.2996	45.1523	1.85815		SH3-domain binding protein 1	Unknown	other	SH3BP1
3065407	FBXL13	2	5.62e-06	4.86e-06	4081	2.99e-08	129.208	46.3633	-2.78685		F-box and leucine-rich repeat protein 13	Unknown	enzyme	FBXL13
3727583	HLF	2	0.0117458	0.0116945	3464	0.00176479	75.7842	46.6531	-1.62442	Cancer, Hematological Disease	hepatic leukemia factor	Nucleus	transcription regulator	HLF
3636391	HOMER2	2	1.49e-06	1.48e-06	4177	3.26e-09	101.596	46.8637	-2.1679		homer homolog 2 (Drosophila)	Plasma Membrane	other	HOMER2
2522212	SGOL2	2	1.63e-05	1.5e-05	1408	8.84e-07	22.705	47.0669	2.07297		shugoshin-like 2 (S. pombe)	Nucleus	other	SGOL2
2357845	FCGR1A	2	7.11e-05	6.26e-05	1588	2.54e-05	24.769	47.0867	1.90104	Antigen Presentation, Antimicrobial Response, Connective Tissue Disorders, Dermatological Diseases and Conditions, Genetic Disorder, Hematological Disease, Immunological Disease, Inflammatory Disease, Inflammatory Response, Neurological Disease, Organismal Injury and Abnormalities, Renal and Urological Disease, Skeletal and Muscular Disorders	Fc fragment of IgG, high affinity Ia, receptor (CD64)	Plasma Membrane	transmembrane receptor	FCGR1A
3388785	MMP10	2	0.000230785	0.000173955	1559	1.53e-05	19.128	47.5094	2.48376	Cancer, Connective Tissue Disorders, Genetic Disorder, Inflammatory Disease, Reproductive System Disease, Skeletal and Muscular Disorders	matrix metallopeptidase 10 (stromelysin 2)	Extracellular Space	peptidase	MMP10
2711610	LRRC15	2	0.0320284	0.0304373	1662	8.79e-05	13.981	47.9669	3.43087	Cancer, Reproductive System Disease	leucine rich repeat containing 15	Plasma Membrane	other	LRRC15
2845362	SLC9A3	2	1.23e-07	7.97e-08	4068	3.99e-08	118.122	48.0995	-2.45579		solute carrier family 9 (sodium/hydrogen exchanger), member 3	Plasma Membrane	ion channel	SLC9A3
3389647	GUCY1A2	2	0.00355057	0.00339718	1698	0.000156311	25.048	48.4487	1.93423	Cancer, Cardiovascular Disease, Genetic Disorder, Infectious Disease, Organismal Injury and Abnormalities, Reproductive System Disease	guanylate cyclase 1, soluble, alpha 2	Cytoplasm	enzyme	GUCY1A2
4000155	GPM6B	2	0.0416544	0.0415511	3285	0.0152404	71.7905	48.6689	-1.47508		glycoprotein M6B	Plasma Membrane	other	GPM6B
2838656	HMMR	2	1.47e-05	1.23e-05	1580	2.21e-05	23.4994	49.2659	2.09647	Cancer, Connective Tissue Disorders, Genetic Disorder, Hematological Disease, Inflammatory Disease, Organismal Injury and Abnormalities, Reproductive System Disease, Skeletal and Muscular Disorders	hyaluronan-mediated motility receptor (RHAMM)	Plasma Membrane	other	HMMR
3632907	SEMA7A	2	8.85e-06	8.5e-06	1466	2.75e-06	26.683	49.3255	1.84858	Antigen Presentation, Inflammatory Response, Organismal Injury and Abnormalities, Respiratory Disease	semaphorin 7A, GPI membrane anchor (John Milton Hagen blood group)	Plasma Membrane	other	SEMA7A
3957188	OSM	2	0.00342325	0.00310949	1920	0.00359195	21.9968	49.6498	2.25713	Antigen Presentation, Cancer, Cardiovascular Disease, Connective Tissue Disorders, Dermatological Diseases and Conditions, Developmental Disorder, Genetic Disorder, Hematological Disease, Hepatic System Disease, Hypersensitivity Response, Immunological Disease, Inflammatory Disease, Inflammatory Response, Organismal Injury and Abnormalities, Reproductive System Disease, Respiratory Disease, Skele…	oncostatin M	Extracellular Space	cytokine	OSM
3484641	BRCA2	2	8.14e-07	6.63e-07	1092	7.62e-10	22.7302	49.6842	2.18583	Cancer, Connective Tissue Disorders, Dermatological Diseases and Conditions, Endocrine System Disorders, Genetic Disorder, Neurological Disease, Renal and Urological Disease, Reproductive System Disease	breast cancer 2, early onset	Nucleus	transcription regulator	BRCA2
3042777	HOXA3	2	0.0370278	0.0370278	1921	0.00363721	36.0992	49.8447	1.38077	Developmental Disorder, Endocrine System Disorders, Hematological Disease, Immunological Disease, Skeletal and Muscular Disorders	homeobox A3	Nucleus	transcription regulator	HOXA3
2330773	CDCA8	2	3.54e-06	2.4e-06	1305	1.04e-07	21.3248	50.3444	2.36084	Cancer, Gastrointestinal Disease, Genetic Disorder, Reproductive System Disease, Respiratory Disease	cell division cycle associated 8	Nucleus	other	CDCA8
2953501	TREM2	2	3.81e-07	3.33e-07	1130	1.93e-09	21.6743	50.3946	2.32509	Antigen Presentation, Genetic Disorder, Inflammatory Response, Neurological Disease, Reproductive System Disease	triggering receptor expressed on myeloid cells 2	Plasma Membrane	transmembrane receptor	TREM2
4054414		2	2.85e-06	2.31e-06	1415	1.02e-06	26.1124	50.4465	1.9319
3638188	HAPLN3	2	8.98e-09	5.4e-09	1150	3.11e-09	24.8684	50.4504	2.02869		hyaluronan and proteoglycan link protein 3	Extracellular Space	other	HAPLN3
2511153	KCNJ3	2	0.00727712	0.00693944	2047	0.0157407	26.8822	50.5318	1.87975		potassium inwardly-rectifying channel, subfamily J, member 3	Plasma Membrane	ion channel	KCNJ3
2922715	FAM26E	2	3.98e-07	2.9e-07	1395	6.81e-07	25.1222	50.7003	2.01814		family with sequence similarity 26, member E	Unknown	other	FAM26E
3673684	CDT1	2	1.67e-07	1.1e-07	1008	9.09e-11	20.6527	50.9705	2.46798	Cancer, Gastrointestinal Disease	chromatin licensing and DNA replication factor 1	Nucleus	other	CDT1
3619945	OIP5	2	0.00182808	0.00182213	1321	1.47e-07	26.3045	51.0312	1.94001		Opa interacting protein 5	Nucleus	other	OIP5
3162486	TYRP1	2	0.00754023	0.00750454	1737	0.000285426	29.9719	51.2074	1.70851	Antigen Presentation, Dermatological Diseases and Conditions, Genetic Disorder, Inflammatory Response, Ophthalmic Disease	tyrosinase-related protein 1	Cytoplasm	enzyme	TYRP1
2509988	LOC130576	2	1.54e-06	8.99e-07	3795	9.75e-06	121.674	52.4269	-2.32083
2413203	LRP8	2	1.74e-08	1.07e-08	962	2.71e-11	22.6503	52.8997	2.3355	Cancer, Cardiovascular Disease, Gastrointestinal Disease, Genetic Disorder, Neurological Disease, Organismal Injury and Abnormalities, Reproductive System Disease	low density lipoprotein receptor-related protein 8, apolipoprotein e receptor	Plasma Membrane	transmembrane receptor	LRP8
3140213	MSC	2	5.31e-08	2.75e-08	1326	1.63e-07	22.7364	53.0637	2.33386	Cancer, Gastrointestinal Disease	musculin (activated B-cell factor-1)	Cytoplasm	transcription regulator	MSC
2643901	PPP2R3A	2	1.2e-07	9.1e-08	4018	1.19e-07	95.6149	53.2031	-1.79717	Cancer, Reproductive System Disease, Skeletal and Muscular Disorders	protein phosphatase 2 (formerly 2A), regulatory subunit B'', alpha	Nucleus	phosphatase	PPP2R3A
3603436	CHRNA5	2	0.000314478	0.000269822	1108	1.13e-09	21.3201	53.6697	2.51733	Cancer, Cardiovascular Disease, Endocrine System Disorders, Gastrointestinal Disease, Genetic Disorder, Hematological Disease, Hepatic System Disease, Metabolic Disease, Neurological Disease, Ophthalmic Disease, Psychological Disorders, Renal and Urological Disease, Reproductive System Disease, Respiratory Disease	cholinergic receptor, nicotinic, alpha 5	Plasma Membrane	transmembrane receptor	CHRNA5
3761395	HOXB6	2	8.94e-05	6.71e-05	1428	1.31e-06	21.5036	54.5104	2.53495		homeobox B6	Nucleus	transcription regulator	HOXB6
3349293	NCAM1	2	1.33e-06	1.09e-06	4077	3.27e-08	109.934	54.6671	-2.01098	Cancer, Endocrine System Disorders, Genetic Disorder, Hematological Disease, Inflammatory Response, Neurological Disease, Psychological Disorders, Reproductive System Disease, Respiratory Disease, Skeletal and Muscular Disorders	neural cell adhesion molecule 1	Plasma Membrane	other	NCAM1
4052881	FAM72B	2	0.000183496	0.000177004	1196	9.16e-09	23.3261	54.7984	2.34923		family with sequence similarity 72, member B	Unknown	other	FAM72B
3776139	NDC80	2	5.12e-07	3.5e-07	1076	5.12e-10	22.167	54.9059	2.47692		NDC80 homolog, kinetochore complex component (S. cerevisiae)	Nucleus	other	NDC80
3833893	CYP2B7P1	2	0.00363056	0.00361659	1795	0.000670971	26.9519	55.1361	2.04572		cytochrome P450, family 2, subfamily B, polypeptide 7 pseudogene 1	Unknown	enzyme	CYP2B7P1
3677268	PRSS22	2	3.63e-06	2.1e-06	1324	1.57e-07	22.835	56.0392	2.45409
4002081	MAP7D2	2	4.81e-06	4.61e-06	3933	6.95e-07	116.918	56.1437	-2.08248		MAP7 domain containing 2	Unknown	other	MAP7D2
3444043	OLR1	2	7.13e-05	5.58e-05	1334	1.93e-07	18.7043	56.1959	3.00443	Antigen Presentation, Cancer, Cardiovascular Disease, Hepatic System Disease, Inflammatory Response, Organismal Injury and Abnormalities	oxidized low density lipoprotein (lectin-like) receptor 1	Plasma Membrane	transmembrane receptor	OLR1
3984655	CENPI	2	2.83e-06	2.77e-06	1095	8.21e-10	25.4386	56.2401	2.21082	Cancer, Reproductive System Disease	centromere protein I	Nucleus	other	CENPI
2770039	NMU	2	0.00151289	0.00141235	1928	0.00396886	27.806	56.7083	2.03943	Cardiovascular Disease, Endocrine System Disorders, Genetic Disorder, Hypersensitivity Response, Inflammatory Response, Metabolic Disease, Nutritional Disease, Organismal Injury and Abnormalities, Psychological Disorders	neuromedin U	Extracellular Space	other	NMU
3790704	PMAIP1	2	0.000387876	0.000365031	1558	1.5e-05	32.2652	56.9516	1.76511	Cancer, Cardiovascular Disease, Connective Tissue Disorders, Dermatological Diseases and Conditions, Neurological Disease, Organismal Injury and Abnormalities, Reproductive System Disease, Skeletal and Muscular Disorders	phorbol-12-myristate-13-acetate-induced protein 1	Cytoplasm	other	PMAIP1
2415266	CYP2J2	2	0.0176503	0.0176468	2018	0.0114592	39.2867	57.0306	1.45165	Cancer, Hepatic System Disease, Reproductive System Disease, Respiratory Disease	cytochrome P450, family 2, subfamily J, polypeptide 2	Cytoplasm	enzyme	CYP2J2
3216319	ZNF367	2	3.39e-07	2.21e-07	1357	3.13e-07	26.4522	57.4786	2.17292		zinc finger protein 367	Nucleus	transcription regulator	ZNF367
3703112	GINS2	2	4.77e-05	4.17e-05	1365	3.69e-07	27.9728	57.8345	2.06752	Cancer, Connective Tissue Disorders, Gastrointestinal Disease, Genetic Disorder, Immunological Disease, Inflammatory Disease, Skeletal and Muscular Disorders	GINS complex subunit 2 (Psf2 homolog)	Nucleus	other	GINS2
3761420	HOXB7	2	1.03e-06	9.6e-07	1443	1.76e-06	30.3062	57.8865	1.91006	Antigen Presentation, Cancer, Inflammatory Response, Reproductive System Disease	homeobox B7	Nucleus	transcription regulator	HOXB7
3140920	JPH1	2	0.0177415	0.0177304	1828	0.00106784	35.6114	58.5516	1.64418		junctophilin 1	Plasma Membrane	other	JPH1
3339880	RELT	2	2.2e-07	1.7e-07	1290	7.54e-08	31.9252	59.0749	1.85042		RELT tumor necrosis factor receptor	Plasma Membrane	transmembrane receptor	RELT
3689880	SHCBP1	2	0.000314523	0.000313066	1348	2.6e-07	31.137	59.3074	1.90472		SHC SH2-domain binding protein 1	Unknown	other	SHCBP1
3890333	TFAP2C	2	0.000148779	0.0001042	1633	5.45e-05	20.6116	59.6294	2.893	Cancer, Reproductive System Disease	transcription factor AP-2 gamma (activating enhancer binding protein 2 gamma)	Nucleus	transcription regulator	TFAP2C
2852591	ADAMTS12	2	5.38e-10	2.02e-10	1001	7.58e-11	25.6364	59.7044	2.32889	Connective Tissue Disorders, Genetic Disorder, Inflammatory Disease, Skeletal and Muscular Disorders	ADAM metallopeptidase with thrombospondin type 1 motif, 12	Extracellular Space	peptidase	ADAMTS12
2438282	IQGAP3	2	2.25e-06	1.21e-06	1115	1.34e-09	26.6848	60.0707	2.25112		IQ motif containing GTPase activating protein 3	Unknown	other	IQGAP3
2400655	RAP1GAP	2	0.000146204	0.000137192	3716	3.9e-05	114.725	60.1245	-1.90812	Cancer, Endocrine System Disorders, Genetic Disorder, Hematological Disease, Immunological Disease, Neurological Disease	RAP1 GTPase activating protein	Cytoplasm	other	RAP1GAP
3390860	POU2AF1	2	0.0126559	0.0126559	3551	0.000524913	91.0401	60.14	-1.5138	Antigen Presentation, Hematological Disease, Immunological Disease, Inflammatory Response	POU class 2 associating factor 1	Nucleus	transcription regulator	POU2AF1
2974935	SLC2A12	2	7.3e-09	2.54e-09	4150	6.17e-09	167.839	60.6078	-2.76926		solute carrier family 2 (facilitated glucose transporter), member 12	Unknown	transporter	SLC2A12
2433432	GJA5	2	0.000570688	0.000552574	1743	0.000312518	36.5943	60.7184	1.65923	Cardiovascular Disease, Genetic Disorder	gap junction protein, alpha 5, 40kDa	Plasma Membrane	transporter	GJA5
3304301	PSD	2	0.0423609	0.0421044	3183	0.0426218	101.793	60.8582	-1.67263		pleckstrin and Sec7 domain containing	Unknown	other	PSD
2876897	SPOCK1	2	0.000172107	0.000144465	1885	0.00229663	32.0101	60.9102	1.90285	Genetic Disorder, Neurological Disease	sparc/osteonectin, cwcv and kazal-like domains proteoglycan (testican) 1	Extracellular Space	other	SPOCK1
3235255	ECHDC3	2	0.00445849	0.00445479	3632	0.000153872	95.429	60.9949	-1.56454		enoyl Coenzyme A hydratase domain containing 3	Unknown	enzyme	ECHDC3
3390852	FLJ45803	2	1.43e-08	9.41e-09	4069	3.9e-08	144.745	61.6703	-2.34707
3629416	RASL12	2	0.00699311	0.00694606	1838	0.0012255	41.7317	61.7044	1.4786	Genetic Disorder, Neurological Disease	RAS-like, family 12	Unknown	enzyme	RASL12
2914777	TTK	2	0.00010061	9.59e-05	1515	6.89e-06	30.3067	62.1511	2.05074	Cancer, Gastrointestinal Disease, Reproductive System Disease	TTK protein kinase	Nucleus	kinase	TTK
4017281	NUP62CL	2	1.76e-08	5.65e-09	1181	6.46e-09	21.1849	62.1563	2.93399		nucleoporin 62kDa C-terminal like	Unknown	other	NUP62CL
2337716	PRKAA2	2	0.000947549	0.000881721	3614	0.000203778	120.386	62.1694	-1.93641	Cancer, Cardiovascular Disease, Genetic Disorder, Hepatic System Disease, Neurological Disease, Nutritional Disease, Organismal Injury and Abnormalities, Skeletal and Muscular Disorders	protein kinase, AMP-activated, alpha 2 catalytic subunit	Cytoplasm	kinase	PRKAA2
2374126	NR5A2	2	4.97e-05	4.81e-05	1407	8.66e-07	33.4002	62.1989	1.86223	Gastrointestinal Disease, Genetic Disorder, Inflammatory Disease, Organismal Injury and Abnormalities	nuclear receptor subfamily 5, group A, member 2	Nucleus	ligand-dependent nuclear receptor	NR5A2
3936913	CDC45L	2	2.07e-05	1.89e-05	1085	6.41e-10	27.786	63.5317	2.28646	Cancer	CDC45 cell division cycle 45-like (S. cerevisiae)	Nucleus	other	CDC45L
3750785	SPAG5	2	4.29e-06	4.02e-06	1083	6.1e-10	27.8739	63.6808	2.28461		sperm associated antigen 5	Nucleus	peptidase	SPAG5
3457824	TIMELESS	2	4.52e-08	2.8e-08	1111	1.21e-09	29.8875	63.7217	2.13205	Genetic Disorder, Neurological Disease, Psychological Disorders	timeless homolog (Drosophila)	Nucleus	other	TIMELESS
3452818	VDR	2	2.49e-05	2.49e-05	1441	1.7e-06	38.4884	64.0215	1.6634	Antigen Presentation, Cancer, Cardiovascular Disease, Connective Tissue Disorders, Dermatological Diseases and Conditions, Developmental Disorder, Endocrine System Disorders, Gastrointestinal Disease, Genetic Disorder, Hematological Disease, Immunological Disease, Infection Mechanism, Inflammatory Disease, Inflammatory Response, Metabolic Disease, Nutritional Disease, Organismal Injury and Abnorm…	vitamin D (1,25- dihydroxyvitamin D3) receptor	Nucleus	ligand-dependent nuclear receptor	VDR
2698996	PCOLCE2	2	0.0386135	0.0386135	3811	7.28e-06	105.727	64.0938	-1.64956		procollagen C-endopeptidase enhancer 2	Extracellular Space	other	PCOLCE2
3442322	CDCA3	2	1.16e-06	9.12e-07	1354	2.94e-07	27.3524	64.098	2.34341		cell division cycle associated 3	Cytoplasm	other	CDCA3
3839464	CLEC11A	2	1.07e-07	6.66e-08	1171	5.11e-09	26.1833	65.2492	2.49202	Antigen Presentation, Cancer, Dermatological Diseases and Conditions, Hematological Disease, Hypersensitivity Response, Immunological Disease, Infectious Disease, Inflammatory Response	C-type lectin domain family 11, member A	Extracellular Space	growth factor	CLEC11A
3572209	PGF	2	5.93e-10	4.24e-10	1015	1.09e-10	28.1152	65.2669	2.32141	Antigen Presentation, Cancer, Cardiovascular Disease, Hematological Disease, Inflammatory Disease, Inflammatory Response	placental growth factor	Extracellular Space	growth factor	PGF
2738244	FLJ20184	2	0.00430242	0.00421542	2000	0.00935432	42.8172	65.312	1.52537
2526806	cdna(scan)	2	0.0298952	0.0296612	2070	0.0200798	42.1094	65.6065	1.558
2691850	ILDR1	2	6.37e-11	2.5e-11	998	7.01e-11	33.4348	66.5412	1.99018		immunoglobulin-like domain containing receptor 1	Plasma Membrane	transmembrane receptor	ILDR1
2773972	CXCL11	2	0.00210274	0.00202356	1813	0.000866204	38.0596	66.9237	1.75839	Antigen Presentation, Hypersensitivity Response, Infectious Disease, Inflammatory Response, Organismal Injury and Abnormalities, Respiratory Disease	chemokine (C-X-C motif) ligand 11	Extracellular Space	cytokine	CXCL11
2687979	KIAA1524	2	4.08e-05	3.95e-05	1090	7.25e-10	30.682	67.1119	2.18734		KIAA1524	Cytoplasm	other	KIAA1524
3839910	FPRL1	2	0.0104093	0.0102482	2061	0.0182711	42.7224	67.1726	1.57231
3523881	KDELC1	2	2.92e-07	2.75e-07	1225	1.78e-08	34.242	67.246	1.96384		KDEL (Lys-Asp-Glu-Leu) containing 1	Unknown	other	KDELC1
3690154	NETO2	2	2e-06	9.54e-07	1332	1.86e-07	23.2935	67.6707	2.90513		neuropilin (NRP) and tolloid (TLL)-like 2	Unknown	other	NETO2
3041409	IGF2BP3	2	4.14e-05	3.3e-05	1104	1.02e-09	19.2642	67.8969	3.52451	Cancer, Hematological Disease, Reproductive System Disease	insulin-like growth factor 2 mRNA binding protein 3	Nucleus	other	IGF2BP3
3605395	ADAMTSL3	2	0.00395029	0.00392478	3582	0.000331897	104.412	67.997	-1.53553		ADAMTS-like 3	Unknown	other	ADAMTSL3
3341137	B3GNT6	2	0.0160172	0.0159941	3622	0.000179965	112.767	68.1249	-1.6553	Cancer, Gastrointestinal Disease, Genetic Disorder, Inflammatory Disease	UDP-GlcNAc:betaGal beta-1,3-N-acetylglucosaminyltransferase 6 (core 3 synthase)	Cytoplasm	enzyme	B3GNT6
3645477	PAQR4	2	1.14e-06	7.27e-07	1386	5.68e-07	33.7764	68.5445	2.02936		progestin and adipoQ receptor family member IV	Unknown	other	PAQR4
3671202	CDH13	2	0.000187619	0.000176113	1464	2.64e-06	38.7899	68.5483	1.76717	Cancer, Neurological Disease	cadherin 13, H-cadherin (heart)	Plasma Membrane	other	CDH13
3174121	MAMDC2	2	7.5e-05	7.04e-05	3840	4.25e-06	131.169	68.5967	-1.91218		MAM domain containing 2	Extracellular Space	other	MAMDC2
3381879	P4HA3	2	1.22e-07	3.8e-08	954	2.19e-11	20.5574	69.1836	3.36539		procollagen-proline, 2-oxoglutarate 4-dioxygenase (proline 4-hydroxylase), alpha polypeptide III	Unknown	enzyme	P4HA3
2834743	ADRB2	2	0.0174078	0.0174063	3480	0.00142359	96.4317	69.661	-1.3843	Antigen Presentation, Cancer, Cardiovascular Disease, Connective Tissue Disorders, Dermatological Diseases and Conditions, Developmental Disorder, Endocrine System Disorders, Genetic Disorder, Hematological Disease, Hepatic System Disease, Immunological Disease, Inflammatory Disease, Inflammatory Response, Metabolic Disease, Neurological Disease, Nutritional Disease, Ophthalmic Disease, Organisma…	adrenergic, beta-2-, receptor, surface	Plasma Membrane	G-protein coupled receptor	ADRB2
3335571	OVOL1	2	0.000299794	0.000286428	1468	2.85e-06	33.5824	70.1309	2.08833		ovo-like 1(Drosophila)	Nucleus	transcription regulator	OVOL1
3590014	CASC5	2	0.000193138	0.00019281	1191	8.16e-09	35.4397	70.3798	1.9859		cancer susceptibility candidate 5	Nucleus	other	CASC5
2443370	F5	2	0.0126404	0.0123915	2113	0.0310403	38.0776	70.4999	1.85148	Cardiovascular Disease, Genetic Disorder, Hematological Disease, Infectious Disease, Inflammatory Disease, Inflammatory Response, Neurological Disease, Organismal Injury and Abnormalities, Respiratory Disease	coagulation factor V (proaccelerin, labile factor)	Plasma Membrane	other	F5
2449559	ASPM	2	6.15e-07	5.47e-07	1145	2.76e-09	30.7402	70.5697	2.29568	Genetic Disorder, Neurological Disease	asp (abnormal spindle) homolog, microcephaly associated (Drosophila)	Nucleus	other	ASPM
2772127	UGT2B15	2	0.000252417	0.000224963	3771	1.5e-05	166.998	70.6391	-2.36409	Cancer, Genetic Disorder, Hepatic System Disease, Reproductive System Disease	UDP glucuronosyltransferase 2 family, polypeptide B15	Cytoplasm	enzyme	UGT2B15
3406880	PIK3C2G	2	1.57e-05	1.47e-05	3806	7.98e-06	148.303	71.2545	-2.08132	Genetic Disorder, Neurological Disease, Psychological Disorders	phosphoinositide-3-kinase, class 2, gamma polypeptide	Cytoplasm	kinase	PIK3C2G
3783565	TTR	2	0.0238079	0.0232179	3667	8.79e-05	166.471	72.4055	-2.29915	Endocrine System Disorders, Genetic Disorder, Metabolic Disease, Neurological Disease, Psychological Disorders	transthyretin	Extracellular Space	transporter	TTR
3973891	SYTL5	2	0.000535094	0.000531197	3685	6.55e-05	127.234	72.6138	-1.75221		synaptotagmin-like 5	Unknown	other	SYTL5
3873160	TRIB3	2	0.0196382	0.0196244	1747	0.000331897	41.1783	73.0643	1.77434	Dermatological Diseases and Conditions, Endocrine System Disorders, Metabolic Disease, Renal and Urological Disease	tribbles homolog 3 (Drosophila)	Nucleus	kinase	TRIB3
2948683	SFTPG	2	0.00132182	0.00110424	1882	0.00220846	25.9739	73.1532	2.81641
3734355	GPRC5C	2	0.000434038	0.000427318	3586	0.000312518	128.836	73.3473	-1.75651	Genetic Disorder, Neurological Disease	G protein-coupled receptor, family C, group 5, member C	Plasma Membrane	G-protein coupled receptor	GPRC5C
3789727	ONECUT2	2	0.000124127	0.000116308	1390	6.15e-07	34.0339	73.3747	2.15593		one cut homeobox 2	Nucleus	transcription regulator	ONECUT2
2411228	STIL	2	6.78e-07	4.52e-07	1139	2.39e-09	29.3946	73.6196	2.50452	Cancer, Reproductive System Disease	SCL/TAL1 interrupting locus	Nucleus	other	STIL
2616131	CCR4	2	0.000691296	0.000679741	1658	8.24e-05	44.6602	73.6835	1.64987	Antigen Presentation, Connective Tissue Disorders, Dermatological Diseases and Conditions, Genetic Disorder, Immunological Disease, Inflammatory Disease, Inflammatory Response, Skeletal and Muscular Disorders	chemokine (C-C motif) receptor 4	Plasma Membrane	G-protein coupled receptor	CCR4
2841964	MSX2	2	0.000264232	0.00026027	1434	1.48e-06	40.1236	74.6403	1.86026	Cardiovascular Disease, Dermatological Diseases and Conditions, Developmental Disorder, Genetic Disorder, Infection Mechanism, Organismal Injury and Abnormalities, Skeletal and Muscular Disorders	msh homeobox 2	Nucleus	transcription regulator	MSX2
2378937	DTL	2	3.38e-06	2.85e-06	1175	5.62e-09	30.9455	74.6783	2.41322	Cancer, Neurological Disease	denticleless homolog (Drosophila)	Nucleus	other	DTL
3290210	ZWINT	2	1.81e-05	1.73e-05	1503	5.52e-06	37.872	74.8439	1.97623	Cancer, Gastrointestinal Disease, Genetic Disorder	ZW10 interactor	Nucleus	other	ZWINT
3331903	FAM111B	2	2.42e-05	2.06e-05	1367	3.85e-07	34.281	75.563	2.20423		family with sequence similarity 111, member B	Unknown	other	FAM111B
3558270	CBLN3	2	1.09e-05	8e-06	3754	2.02e-05	151.696	75.6382	-2.00555		cerebellin 3 precursor	Extracellular Space	other	CBLN3
2426676	C1orf59	2	1.47e-05	1.12e-05	1244	2.73e-08	37.3933	76.0978	2.03507
3056264	ABHD11	2	7.78e-09	2.74e-09	1177	5.89e-09	37.2371	76.1825	2.04587		abhydrolase domain containing 11	Unknown	enzyme	ABHD11
3258168	KIF11	2	2.04e-06	1.78e-06	1270	4.87e-08	35.1902	76.5402	2.17504	Cancer, Genetic Disorder, Immunological Disease, Neurological Disease, Organismal Injury and Abnormalities, Reproductive System Disease, Respiratory Disease, Skeletal and Muscular Disorders	kinesin family member 11	Nucleus	other	KIF11
3250237	HKDC1	2	6.05e-06	5.57e-06	1166	4.55e-09	32.43	76.7519	2.3667		hexokinase domain containing 1	Unknown	kinase	HKDC1
2494484	NCAPH	2	4.08e-06	3.4e-06	1211	1.29e-08	34.2967	79.0991	2.30632		non-SMC condensin I complex, subunit H	Nucleus	other	NCAPH
2470470	FAM84A	2	0.000391148	0.000361533	1813	0.000866204	40.1121	79.8942	1.99177		family with sequence similarity 84, member A	Unknown	other	FAM84A
3089215	BMP1	2	1.2e-09	4.87e-10	1036	1.87e-10	37.7521	79.9729	2.11837	Connective Tissue Disorders, Genetic Disorder, Immunological Disease, Inflammatory Disease, Skeletal and Muscular Disorders	bone morphogenetic protein 1	Extracellular Space	peptidase	BMP1
3651672	ANKS4B	2	0.0157661	0.0157661	1891	0.00248271	51.8515	80.0119	1.5431		ankyrin repeat and sterile alpha motif domain containing 4B	Nucleus	transcription regulator	ANKS4B
3308241	GFRA1	2	0.000978271	0.000977519	3664	9.23e-05	120.982	80.1316	-1.50979	Cancer, Developmental Disorder, Genetic Disorder, Hematological Disease, Neurological Disease, Psychological Disorders, Renal and Urological Disease, Reproductive System Disease	GDNF family receptor alpha 1	Plasma Membrane	transmembrane receptor	GFRA1
3140478	RPESP	2	0.00072153	0.000706146	3683	6.77e-05	148.548	80.5576	-1.84399
2334098	KIF2C	2	1.65e-06	1.21e-06	1164	4.34e-09	30.7312	81.0818	2.63842		kinesin family member 2C	Nucleus	other	KIF2C
2371873	HMCN1	2	1.46e-05	1.16e-05	1360	3.33e-07	36.8964	81.0888	2.19775	Genetic Disorder, Ophthalmic Disease	hemicentin 1	Extracellular Space	other	HMCN1
3129149	PBK	2	1.11e-05	1.04e-05	1301	9.57e-08	35.8099	82.0513	2.29131	Cancer, Connective Tissue Disorders, Gastrointestinal Disease, Genetic Disorder, Reproductive System Disease	PDZ binding kinase	Cytoplasm	kinase	PBK
2717857	CPZ	2	3.29e-07	1.97e-07	1385	5.56e-07	39.8023	82.9579	2.08425		carboxypeptidase Z	Extracellular Space	peptidase	CPZ
2761829	FGFBP1	2	0.0118616	0.011598	1924	0.00377613	41.4463	83.029	2.00329	Cancer, Reproductive System Disease	fibroblast growth factor binding protein 1	Extracellular Space	other	FGFBP1
2752725	NEIL3	2	0.000393941	0.00038851	1361	3.4e-07	39.8523	83.3351	2.0911		nei endonuclease VIII-like 3 (E. coli)	Nucleus	enzyme	NEIL3
3247172	DKK1	2	0.00736179	0.00679313	1920	0.00359195	23.9989	84.2119	3.50899	Cancer, Connective Tissue Disorders, Gastrointestinal Disease, Neurological Disease, Reproductive System Disease	dickkopf homolog 1 (Xenopus laevis)	Extracellular Space	growth factor	DKK1
3349719	ZBTB16	2	0.000252461	0.000247789	3871	2.36e-06	159.315	84.3933	-1.88777	Cancer, Dermatological Diseases and Conditions, Genetic Disorder, Hematological Disease, Immunological Disease, Inflammatory Response, Neurological Disease, Reproductive System Disease	zinc finger and BTB domain containing 16	Nucleus	transcription regulator	ZBTB16
2913123	RIMS1	2	3.68e-06	2.75e-06	4010	1.41e-07	193.025	84.6709	-2.27971	Genetic Disorder, Ophthalmic Disease	regulating synaptic membrane exocytosis 1	Cytoplasm	enzyme	RIMS1
2900116	HIST1H2BO	2	0.000220542	0.000206654	1771	0.000473871	42.2429	84.9681	2.01141		histone cluster 1, H2bo	Nucleus	other	HIST1H2BO
3994915	HMGB3	2	2.17e-06	2.13e-06	1059	3.35e-10	39.8829	85.0566	2.13266		high-mobility group box 3	Nucleus	other	HMGB3
2720251	NCAPG	2	0.00143184	0.00143051	1279	5.94e-08	42.4936	86.3212	2.03139	Cancer, Gastrointestinal Disease	non-SMC condensin I complex, subunit G	Nucleus	other	NCAPG
3377423	CDCA5	2	3.54e-08	2.75e-08	1003	7.98e-11	35.0129	86.6555	2.47496	Cancer, Gastrointestinal Disease, Genetic Disorder	cell division cycle associated 5	Cytoplasm	other	CDCA5
2471233	VSNL1	2	0.0485097	0.0484339	1754	0.00036854	48.1448	86.7423	1.8017	Cancer, Genetic Disorder, Neurological Disease	visinin-like 1	Cytoplasm	other	VSNL1
3949055	GTSE1	2	1.27e-07	8.83e-08	1145	2.76e-09	36.1648	86.9179	2.40338		G-2 and S-phase expressed 1	Cytoplasm	other	GTSE1
3671727	ATP2C2	2	4.6e-06	3.69e-06	1541	1.11e-05	45.8309	87.3734	1.90643		ATPase, Ca++ transporting, type 2C, member 2	Cytoplasm	enzyme	ATP2C2
3835923	APOC2	2	0.0137825	0.0137815	1291	7.71e-08	51.3993	88.2262	1.71649	Cardiovascular Disease, Genetic Disorder, Metabolic Disease	apolipoprotein C-II	Extracellular Space	transporter	APOC2
3868841	KLK11	2	1.46e-05	1.09e-05	3747	2.29e-05	248.499	88.8421	-2.79708	Cancer, Reproductive System Disease	kallikrein-related peptidase 11	Extracellular Space	peptidase	KLK11
3581386	CDCA4	2	1.92e-08	1.37e-08	1166	4.55e-09	44.7153	89.3465	1.99812	Cancer, Reproductive System Disease, Respiratory Disease	cell division cycle associated 4	Nucleus	other	CDCA4
3507134	CDX2	2	0.000245567	0.00022133	1513	6.64e-06	45.6728	89.5017	1.95963	Cancer, Connective Tissue Disorders, Gastrointestinal Disease, Inflammatory Disease, Neurological Disease, Organismal Injury and Abnormalities, Skeletal and Muscular Disorders	caudal type homeobox 2	Nucleus	transcription regulator	CDX2
2640855	MCM2	2	3.09e-05	2.77e-05	1097	8.62e-10	44.8723	89.53	1.99522	Cancer, Genetic Disorder, Renal and Urological Disease, Reproductive System Disease, Respiratory Disease	minichromosome maintenance complex component 2	Nucleus	enzyme	MCM2
3401804	RAD51AP1	2	1.89e-06	1.64e-06	1265	4.36e-08	40.6131	90.4082	2.22608		RAD51 associated protein 1	Nucleus	other	RAD51AP1
2388219	EXO1	2	1.33e-07	8.09e-08	1128	1.84e-09	33.1883	90.8729	2.73811		exonuclease 1	Nucleus	enzyme	EXO1
2773947	CXCL9	2	0.00793216	0.00726713	1575	2.02e-05	30.8572	90.8953	2.94567	Antigen Presentation, Cancer, Connective Tissue Disorders, Endocrine System Disorders, Genetic Disorder, Hematological Disease, Hypersensitivity Response, Immunological Disease, Infection Mechanism, Infectious Disease, Inflammatory Disease, Inflammatory Response, Organismal Injury and Abnormalities, Respiratory Disease, Skeletal and Muscular Disorders	chemokine (C-X-C motif) ligand 9	Extracellular Space	cytokine	CXCL9
3545634	NRXN3	2	0.0105136	0.0104196	3322	0.010128	152.148	91.4639	-1.66348		neurexin 3	Plasma Membrane	transporter	NRXN3
2458580	LEFTY1	2	0.00262038	0.00226253	1789	0.000615575	24.0034	91.609	3.8165		left-right determination factor 1	Extracellular Space	growth factor	LEFTY1
2923868	PKIB	2	1.83e-06	1.1e-06	3715	3.96e-05	208.581	92.3375	-2.2589		protein kinase (cAMP-dependent, catalytic) inhibitor beta	Unknown	other	PKIB
3601348	LOXL1	2	1.89e-05	1.65e-05	1604	3.34e-05	49.5719	92.6608	1.86922	Cancer, Genetic Disorder, Ophthalmic Disease, Renal and Urological Disease, Reproductive System Disease	lysyl oxidase-like 1	Extracellular Space	enzyme	LOXL1
2429556	CASQ2	2	0.00807809	0.00801936	3738	2.67e-05	172.296	93.665	-1.83949	Cardiovascular Disease, Developmental Disorder, Genetic Disorder, Neurological Disease	calsequestrin 2 (cardiac muscle)	Cytoplasm	other	CASQ2
2863363	F2RL2	2	2.83e-07	1.39e-07	1199	9.82e-09	36.5068	94.1114	2.57791	Antigen Presentation, Cardiovascular Disease, Hematological Disease, Inflammatory Response, Organismal Injury and Abnormalities, Respiratory Disease	coagulation factor II (thrombin) receptor-like 2	Plasma Membrane	G-protein coupled receptor	F2RL2
3657041	ITGAX	2	9.02e-07	8.14e-07	1360	3.33e-07	49.6468	94.4443	1.90232	Antigen Presentation, Cancer, Hematological Disease, Immunological Disease, Inflammatory Disease, Inflammatory Response	integrin, alpha X (complement component 3 receptor 4 subunit)	Plasma Membrane	other	ITGAX
3783481	DSG3	2	0.000353247	0.000256715	1263	4.17e-08	13.32	94.5124	7.09556	Antigen Presentation, Dermatological Diseases and Conditions, Genetic Disorder, Immunological Disease, Inflammatory Response, Nutritional Disease, Organismal Injury and Abnormalities	desmoglein 3 (pemphigus vulgaris antigen)	Plasma Membrane	other	DSG3
3294280	DNAJC9	2	2.33e-05	2.19e-05	1565	1.7e-05	51.8996	94.622	1.82317		DnaJ (Hsp40) homolog, subfamily C, member 9	Unknown	other	DNAJC9
3699133	FA2H	2	0.00189516	0.00186618	3359	0.00660275	148.021	94.8164	-1.56113	Cancer, Organismal Injury and Abnormalities	fatty acid 2-hydroxylase	Unknown	enzyme	FA2H
3593575	SLC27A2	2	0.000588916	0.000551662	1739	0.000294202	51.7413	96.5062	1.86517	Cancer, Gastrointestinal Disease, Genetic Disorder	solute carrier family 27 (fatty acid transporter), member 2	Cytoplasm	transporter	SLC27A2
3607510	FANCI	2	0.000104507	9.89e-05	1439	1.63e-06	45.7726	96.5799	2.10999		Fanconi anemia, complementation group I	Unknown	other	FANCI
2409004	LEPRE1	2	4.37e-10	1.43e-10	1082	5.95e-10	46.4674	97.0027	2.08755	Developmental Disorder, Genetic Disorder, Skeletal and Muscular Disorders	leucine proline-enriched proteoglycan (leprecan) 1	Nucleus	enzyme	LEPRE1
3381925	PGM2L1	2	0.000402377	0.000382669	1017	1.15e-10	56.2709	97.2362	1.728		phosphoglucomutase 2-like 1	Unknown	enzyme	PGM2L1
3945545	APOBEC3B	2	1.5e-05	1.38e-05	1502	5.42e-06	48.7833	97.3442	1.99544	Infection Mechanism, Reproductive System Disease	apolipoprotein B mRNA editing enzyme, catalytic polypeptide-like 3B	Cytoplasm	enzyme	APOBEC3B
3655628	KIF22	2	2.03e-07	1.49e-07	1247	2.92e-08	45.5946	97.6997	2.14279		kinesin family member 22	Nucleus	other	KIF22
3416895	METTL7B	2	7.2e-06	6.6e-06	1137	2.28e-09	41.7409	98.0037	2.3479		methyltransferase like 7B	Unknown	enzyme	METTL7B
2498274	C2orf40	2	3.77e-05	3.2e-05	3788	1.11e-05	218.408	98.795	-2.21072
3536336	CDKN3	2	9.85e-05	9.84e-05	1264	4.27e-08	46.9738	99.4005	2.11608	Cancer, Gastrointestinal Disease, Genetic Disorder, Hepatic System Disease	cyclin-dependent kinase inhibitor 3	Nucleus	phosphatase	CDKN3
2907671	PTK7	2	2.28e-08	2.12e-08	861	1.7e-12	48.8243	99.6561	2.04112		PTK7 protein tyrosine kinase 7	Plasma Membrane	kinase	PTK7
3400236	B4GALNT3	2	8.42e-08	5.03e-08	3822	5.94e-06	200.995	100.399	-2.00195		beta-1,4-N-acetyl-galactosaminyl transferase 3	Unknown	enzyme	B4GALNT3
2809831	LOC493869	2	6.24e-08	3.81e-08	1386	5.68e-07	47.4769	100.656	2.12011
2891768	FOXC1	2	0.000192109	0.000176902	1571	1.89e-05	56.7114	100.79	1.77723	Cancer, Genetic Disorder, Neurological Disease, Ophthalmic Disease, Reproductive System Disease	forkhead box C1	Nucleus	transcription regulator	FOXC1
2858592	DEPDC1B	2	1.68e-05	1.63e-05	1215	1.42e-08	48.6091	101.211	2.08214		DEP domain containing 1B	Unknown	other	DEPDC1B
3592196	DUOXA2	2	0.000296992	0.000248205	3313	0.0112062	233.983	101.232	-2.31135		dual oxidase maturation factor 2	Cytoplasm	other	DUOXA2
3677315	PKMYT1	2	7.03e-07	3.85e-07	1242	2.61e-08	45.956	101.488	2.20837	Cancer, Skeletal and Muscular Disorders	protein kinase, membrane associated tyrosine/threonine 1	Cytoplasm	kinase	PKMYT1
3980560	KIF4A	2	1.54e-07	1.24e-07	973	3.63e-11	44.5875	101.497	2.27635	Cancer, Reproductive System Disease	kinesin family member 4A	Nucleus	other	KIF4A
3920850	KCNJ15	2	1.15e-07	7.7e-08	3981	2.6e-07	232.51	102.1	-2.27728	Connective Tissue Disorders, Genetic Disorder, Immunological Disease, Inflammatory Disease, Skeletal and Muscular Disorders	potassium inwardly-rectifying channel, subfamily J, member 15	Plasma Membrane	ion channel	KCNJ15
3355145	ST3GAL4	2	5.37e-06	4.22e-06	1515	6.89e-06	55.4078	103.367	1.86557		ST3 beta-galactoside alpha-2,3-sialyltransferase 4	Cytoplasm	enzyme	ST3GAL4
2570616	BUB1	2	1.12e-06	9.13e-07	1160	3.94e-09	41.508	103.499	2.49347	Cancer, Connective Tissue Disorders	BUB1 budding uninhibited by benzimidazoles 1 homolog (yeast)	Nucleus	kinase	BUB1
3230760	C9orf140	2	1e-06	6.98e-07	1407	8.66e-07	41.6473	103.557	2.48652
2842911	FGFR4	2	3.26e-05	2.87e-05	1405	8.32e-07	52.6377	105.495	2.00418	Cancer, Connective Tissue Disorders, Genetic Disorder, Neurological Disease, Skeletal and Muscular Disorders	fibroblast growth factor receptor 4	Plasma Membrane	kinase	FGFR4
3401259	TEAD4	2	8.77e-12	5.66e-12	950	1.97e-11	49.2955	105.836	2.14698	Cancer, Gastrointestinal Disease, Genetic Disorder	TEA domain family member 4	Nucleus	transcription regulator	TEAD4
2980241	FBXO5	2	0.00121926	0.00109536	1378	4.82e-07	55.9023	106.336	1.90217	Cancer, Reproductive System Disease	F-box protein 5	Nucleus	enzyme	FBXO5
3895795	RNF24	2	7.62e-09	6.96e-09	1177	5.89e-09	56.2314	106.545	1.89476		ring finger protein 24	Unknown	other	RNF24
3565663	DLG7	2	6.99e-06	6.17e-06	1232	2.09e-08	43.9686	107.175	2.43753
3456840	PPP1R1A	2	0.00187349	0.00186611	3932	7.09e-07	220.69	107.286	-2.05702	Genetic Disorder, Neurological Disease	protein phosphatase 1, regulatory (inhibitor) subunit 1A	Cytoplasm	phosphatase	PPP1R1A
3373630	AGTRL1	2	1.28e-09	3.85e-10	1061	3.52e-10	39.9519	107.682	2.6953
3939470	MMP11	2	8.35e-06	5.19e-06	919	8.51e-12	30.7207	107.956	3.51413	Antigen Presentation, Cancer, Cardiovascular Disease, Connective Tissue Disorders, Gastrointestinal Disease, Genetic Disorder, Inflammatory Response, Renal and Urological Disease, Reproductive System Disease	matrix metallopeptidase 11 (stromelysin 3)	Extracellular Space	peptidase	MMP11
2362089	KIRREL	2	9.12e-06	8.12e-06	1479	3.52e-06	63.4025	108.129	1.70544	Renal and Urological Disease	kin of IRRE like (Drosophila)	Plasma Membrane	other	KIRREL
3513752	CAB39L	2	0.00206079	0.00203781	3573	0.000379685	167.101	108.131	-1.54536		calcium binding protein 39-like	Unknown	other	CAB39L
3587457	ARHGAP11A	2	4.06e-05	3.98e-05	1163	4.23e-09	49.7056	108.39	2.18063		Rho GTPase activating protein 11A	Unknown	other	ARHGAP11A
2385012	CAPN9	2	4.06e-06	3.77e-06	3914	1.02e-06	230.001	108.526	-2.11932		calpain 9	Cytoplasm	peptidase	CAPN9
2953570	TREM1	2	0.00499933	0.00487692	1992	0.00853505	62.2524	108.701	1.74614	Antigen Presentation, Gastrointestinal Disease, Genetic Disorder, Hematological Disease, Immunological Disease, Infectious Disease, Inflammatory Disease, Inflammatory Response, Metabolic Disease, Organismal Injury and Abnormalities, Respiratory Disease	triggering receptor expressed on myeloid cells 1	Plasma Membrane	other	TREM1
3040363	TWIST1	2	0.00218542	0.00216586	1871	0.00191105	67.6608	109.158	1.61331	Cancer, Connective Tissue Disorders, Dermatological Diseases and Conditions, Gastrointestinal Disease, Genetic Disorder, Inflammatory Disease, Nutritional Disease, Organismal Injury and Abnormalities, Renal and Urological Disease, Reproductive System Disease, Skeletal and Muscular Disorders	twist homolog 1 (Drosophila)	Nucleus	transcription regulator	TWIST1
2862841	GCNT4	2	2.08e-07	1.58e-07	4068	3.99e-08	280.782	110.62	-2.53827		glucosaminyl (N-acetyl) transferase 4, core 2 (beta-1,6-N-acetylglucosaminyltransferase)	Unknown	enzyme	GCNT4
2796995	SORBS2	2	0.000281151	0.000272815	3945	5.45e-07	197.502	111.193	-1.77621	Cancer, Reproductive System Disease	sorbin and SH3 domain containing 2	Nucleus	other	SORBS2
3382015	CHRDL2	2	0.00125494	0.00116748	1962	0.00600416	57.623	111.357	1.93252	Cancer, Reproductive System Disease	chordin-like 2	Extracellular Space	other	CHRDL2
3385951	NOX4	2	0.000417749	0.000408055	1410	9.2e-07	51.9479	111.763	2.15144	Antigen Presentation, Cancer, Dermatological Diseases and Conditions, Developmental Disorder, Inflammatory Response, Renal and Urological Disease, Skeletal and Muscular Disorders	NADPH oxidase 4	Cytoplasm	enzyme	NOX4
2854092	LIFR	2	1.02e-07	1.01e-07	4182	2.9e-09	236.783	112.822	-2.09873	Cancer, Genetic Disorder, Hematological Disease, Infection Mechanism, Neurological Disease, Reproductive System Disease, Skeletal and Muscular Disorders	leukemia inhibitory factor receptor alpha	Plasma Membrane	transmembrane receptor	LIFR
2650357	ARL14	2	0.00732969	0.00711008	3284	0.0154056	187.393	112.903	-1.65978		ADP-ribosylation factor-like 14	Unknown	other	ARL14
2900051	HIST1H3H	2	0.000654663	0.000647434	1535	9.93e-06	59.8478	113.64	1.89882		histone cluster 1, H3h	Unknown	other	HIST1H3H
3533184	SSTR1	2	0.00133154	0.00133068	3772	1.47e-05	190.247	114.109	-1.66724	Cancer, Cardiovascular Disease, Developmental Disorder, Endocrine System Disorders, Gastrointestinal Disease, Genetic Disorder, Inflammatory Disease, Metabolic Disease, Nutritional Disease, Psychological Disorders, Reproductive System Disease, Respiratory Disease	somatostatin receptor 1	Plasma Membrane	G-protein coupled receptor	SSTR1
3440598	FOXM1	2	2.98e-09	2.26e-09	1083	6.1e-10	46.44	115.086	2.47816	Cancer, Connective Tissue Disorders, Developmental Disorder, Endocrine System Disorders, Genetic Disorder, Organismal Injury and Abnormalities, Respiratory Disease, Skeletal and Muscular Disorders	forkhead box M1	Nucleus	transcription regulator	FOXM1
3470503	TMEM119	2	0.0147223	0.0146841	1555	1.42e-05	60.4501	115.116	1.90432		transmembrane protein 119	Unknown	other	TMEM119
3327057	FLJ14213	2	8.65e-12	1.89e-12	784	1.87e-13	52.2547	115.742	2.21495
3997780	ARSE	2	0.000537979	0.00053781	1431	1.39e-06	58.7363	115.824	1.97194	Cancer, Connective Tissue Disorders, Developmental Disorder, Genetic Disorder, Reproductive System Disease, Skeletal and Muscular Disorders	arylsulfatase E (chondrodysplasia punctata 1)	Cytoplasm	enzyme	ARSE
3439268	LOC647503	2	7.58e-07	6.4e-07	3946	5.34e-07	240.119	118.543	-2.02558
3607537	FANCI	2	9.63e-06	9.13e-06	1072	4.64e-10	56.9952	119.547	2.0975		Fanconi anemia, complementation group I	Unknown	other	FANCI
3175274	PCSK5	2	0.000314234	0.000313994	1490	4.33e-06	76.5461	119.592	1.56235	Developmental Disorder, Hematological Disease, Infection Mechanism, Neurological Disease, Organismal Injury and Abnormalities, Renal and Urological Disease	proprotein convertase subtilisin/kexin type 5	Extracellular Space	peptidase	PCSK5
3564620	NID2	2	4.82e-07	3.65e-07	1322	1.5e-07	61.2172	120.165	1.96292	Cancer, Hematological Disease	nidogen 2 (osteonidogen)	Extracellular Space	other	NID2
3772158	TK1	2	8.26e-06	7.83e-06	1382	5.23e-07	62.1599	122.172	1.96545	Cancer, Endocrine System Disorders, Gastrointestinal Disease, Genetic Disorder, Reproductive System Disease, Respiratory Disease	thymidine kinase 1, soluble	Cytoplasm	kinase	TK1
3359461	PHLDA2	2	0.00022049	0.000219299	1554	1.4e-05	72.4726	123.444	1.70332	Cancer, Reproductive System Disease	pleckstrin homology-like domain, family A, member 2	Cytoplasm	other	PHLDA2
2587790	GPR155	2	1.7e-07	1.29e-07	4233	8.41e-10	310.438	123.624	-2.51115		G protein-coupled receptor 155	Plasma Membrane	G-protein coupled receptor	GPR155
3845909	LMNB2	2	1.82e-10	1.05e-10	1012	1.01e-10	65.2672	123.687	1.89509	Genetic Disorder, Metabolic Disease	lamin B2	Nucleus	other	LMNB2
3573870	DIO2	2	8.87e-09	5.17e-09	966	3.02e-11	47.2513	124.014	2.62456	Cardiovascular Disease	deiodinase, iodothyronine, type II	Cytoplasm	enzyme	DIO2
3736290	BIRC5	2	1.25e-08	8.13e-09	1131	1.97e-09	49.6335	124.428	2.50693	Cancer, Cardiovascular Disease, Connective Tissue Disorders, Dermatological Diseases and Conditions, Developmental Disorder, Gastrointestinal Disease, Genetic Disorder, Hematological Disease, Hepatic System Disease, Immunological Disease, Inflammatory Response, Neurological Disease, Renal and Urological Disease, Reproductive System Disease, Respiratory Disease, Skeletal and Muscular Disorders	baculoviral IAP repeat-containing 5	Cytoplasm	other	BIRC5
2905296	PI16	2	4.76e-06	4.16e-06	3965	3.62e-07	318.213	125.234	-2.54094		peptidase inhibitor 16	Extracellular Space	other	PI16
3466369	FGD6	2	0.000270959	0.000270923	1254	3.42e-08	72.8555	125.32	1.72011		FYVE, RhoGEF and PH domain containing 6	Cytoplasm	other	FGD6
2497252	SLC9A2	2	0.000657356	0.000652686	3648	0.000119398	222.31	125.406	-1.77272		solute carrier family 9 (sodium/hydrogen exchanger), member 2	Plasma Membrane	transporter	SLC9A2
2947100	HIST1H2AM	2	1.29e-05	1.05e-05	1419	1.1e-06	57.6717	125.706	2.17969		histone cluster 1, H2am	Unknown	other	HIST1H2AM
3957160	LIF	2	1.1e-05	7.65e-06	1222	1.66e-08	48.8395	126.917	2.59866	Antigen Presentation, Antimicrobial Response, Cancer, Cardiovascular Disease, Connective Tissue Disorders, Developmental Disorder, Endocrine System Disorders, Genetic Disorder, Hematological Disease, Hepatic System Disease, Immunological Disease, Inflammatory Disease, Inflammatory Response, Neurological Disease, Nutritional Disease, Organismal Injury and Abnormalities, Renal and Urological Diseas…	leukemia inhibitory factor (cholinergic differentiation factor)	Extracellular Space	cytokine	LIF
3756262	TNS4	2	0.000419508	0.000313594	1254	3.42e-08	25.6129	126.942	4.95616		tensin 4	Cytoplasm	other	TNS4
3667652	MARVELD3	2	1.19e-05	9.01e-06	1500	5.22e-06	54.9596	128.179	2.33225		MARVEL domain containing 3	Unknown	other	MARVELD3
3847486	FUT3	2	0.00175538	0.0017066	1985	0.00787146	77.3729	130.602	1.68795	Cancer	fucosyltransferase 3 (galactoside 3(4)-L-fucosyltransferase, Lewis blood group)	Cytoplasm	enzyme	FUT3
2781138	LEF1	2	1.9e-07	1.22e-07	1120	1.51e-09	58.4778	132.702	2.26927	Cancer, Connective Tissue Disorders, Dermatological Diseases and Conditions, Immunological Disease, Infectious Disease, Neurological Disease, Organismal Injury and Abnormalities, Respiratory Disease	lymphoid enhancer-binding factor 1	Nucleus	transcription regulator	LEF1
3264059	ADRA2A	2	0.0112178	0.0111696	1811	0.000842163	89.9423	135.16	1.50274	Cancer, Cardiovascular Disease, Dermatological Diseases and Conditions, Developmental Disorder, Endocrine System Disorders, Genetic Disorder, Hematological Disease, Immunological Disease, Infection Mechanism, Infectious Disease, Inflammatory Disease, Inflammatory Response, Neurological Disease, Nutritional Disease, Ophthalmic Disease, Organismal Injury and Abnormalities, Psychological Disorders, …	adrenergic, alpha-2A-, receptor	Plasma Membrane	G-protein coupled receptor	ADRA2A
3127818	LOXL2	2	3.19e-11	1.49e-11	954	2.19e-11	61.2388	136.844	2.23461	Cancer	lysyl oxidase-like 2	Extracellular Space	enzyme	LOXL2
3590388	NUSAP1	2	0.000893021	0.000885833	1299	9.17e-08	70.1436	137.029	1.95355		nucleolar and spindle associated protein 1	Nucleus	other	NUSAP1
2434178	MTMR11	2	3.56e-05	2.38e-05	1302	9.78e-08	57.4077	137.158	2.3892		myotubularin related protein 11	Unknown	other	MTMR11
3558375	GZMB	2	0.000388111	0.000321976	1728	0.000248884	67.8376	138.794	2.04598	Antigen Presentation, Antimicrobial Response, Cancer, Cardiovascular Disease, Connective Tissue Disorders, Gastrointestinal Disease, Genetic Disorder, Hematological Disease, Immunological Disease, Inflammatory Disease, Inflammatory Response, Reproductive System Disease, Respiratory Disease, Skeletal and Muscular Disorders	granzyme B (granzyme 2, cytotoxic T-lymphocyte-associated serine esterase 1)	Cytoplasm	peptidase	GZMB
3599811	KIF23	2	1.31e-07	1.02e-07	1015	1.09e-10	58.4905	139.679	2.38806	Cancer, Reproductive System Disease	kinesin family member 23	Cytoplasm	other	KIF23
3247818	BICC1	2	0.000186806	0.00017081	1700	0.0001613	72.8702	141.28	1.93879	Cancer, Genetic Disorder, Hepatic System Disease, Renal and Urological Disease	bicaudal C homolog 1 (Drosophila)	Unknown	other	BICC1
2941972	C6orf105	2	5.73e-06	5.08e-06	3762	1.76e-05	287.005	142.445	-2.01484
3984468	SRPX2	2	1.41e-07	8.15e-08	1206	1.15e-08	59.3391	142.531	2.40198		sushi-repeat-containing protein, X-linked 2	Unknown	other	SRPX2
2604254	HJURP	2	2.53e-07	1.72e-07	1227	1.86e-08	58.4574	143.935	2.46222	Cancer, Skeletal and Muscular Disorders	Holliday junction recognition protein	Nucleus	other	HJURP
3639031	PRC1	2	1.47e-05	1.42e-05	1105	1.05e-09	65.1007	144.25	2.21581	Cancer, Genetic Disorder, Renal and Urological Disease, Reproductive System Disease, Skeletal and Muscular Disorders	protein regulator of cytokinesis 1	Nucleus	other	PRC1
3485074	RFC3	2	0.000314534	0.000295616	1182	6.62e-09	64.8639	144.872	2.23347		replication factor C (activator 1) 3, 38kDa	Nucleus	enzyme	RFC3
3504193	GJB2	2	1.11e-05	6.56e-06	1139	2.39e-09	48.8749	148.391	3.03614	Auditory Disease, Cancer, Dermatological Diseases and Conditions, Genetic Disorder, Hepatic System Disease, Inflammatory Response, Neurological Disease	gap junction protein, beta 2, 26kDa	Plasma Membrane	transporter	GJB2
3841621	LILRB4	2	8.05e-06	6.05e-06	1429	1.34e-06	73.0704	150.022	2.05311	Genetic Disorder, Hypersensitivity Response, Immunological Disease, Inflammatory Disease, Inflammatory Response, Skeletal and Muscular Disorders	leukocyte immunoglobulin-like receptor, subfamily B (with TM and ITIM domains), member 4	Plasma Membrane	other	LILRB4
2827185	LMNB1	2	1.14e-05	1.09e-05	1119	1.48e-09	76.7195	151.437	1.9739	Cancer, Genetic Disorder, Immunological Disease, Neurological Disease	lamin B1	Nucleus	other	LMNB1
3151534	ATAD2	2	0.000602654	0.000600502	1139	2.39e-09	74.6866	152.371	2.04014	Cancer, Genetic Disorder, Neurological Disease, Reproductive System Disease	ATPase family, AAA domain containing 2	Nucleus	other	ATAD2
3895118	CPXM1	2	2.97e-05	1.84e-05	1291	7.71e-08	42.5388	152.914	3.59469		carboxypeptidase X (M14 family), member 1	Extracellular Space	peptidase	CPXM1
2915828	NT5E	2	0.000285406	0.00026701	1794	0.000661427	90.6177	152.947	1.68783	Antigen Presentation, Cardiovascular Disease, Hepatic System Disease, Inflammatory Response, Organismal Injury and Abnormalities, Respiratory Disease	5'-nucleotidase, ecto (CD73)	Plasma Membrane	phosphatase	NT5E
3354799	CHEK1	2	9.83e-07	5.89e-07	1074	4.87e-10	58.47	153.128	2.61891	Cancer, Connective Tissue Disorders, Dermatological Diseases and Conditions, Endocrine System Disorders, Gastrointestinal Disease, Genetic Disorder, Hematological Disease, Immunological Disease, Renal and Urological Disease, Reproductive System Disease, Respiratory Disease, Skeletal and Muscular Disorders	CHK1 checkpoint homolog (S. pombe)	Nucleus	kinase	CHEK1
3629103	KIAA0101	2	8.59e-05	8.17e-05	1432	1.42e-06	73.7071	154.172	2.09169	Cancer, Endocrine System Disorders, Gastrointestinal Disease, Genetic Disorder, Reproductive System Disease	KIAA0101	Nucleus	other	KIAA0101
3893520	RTEL1	2	0.000209863	0.000151432	1191	8.16e-09	42.8892	155.336	3.62181		regulator of telomere elongation helicase 1	Nucleus	enzyme	RTEL1
2493858	MAL	2	0.000128151	0.000113696	3998	1.82e-07	377.885	156.846	-2.40927	Genetic Disorder, Neurological Disease, Psychological Disorders	mal, T-cell differentiation protein	Plasma Membrane	transporter	MAL
3815097	FSTL3	2	2.96e-05	2.59e-05	1634	5.55e-05	87.2159	157.664	1.80775	Cancer, Gastrointestinal Disease, Hepatic System Disease, Reproductive System Disease	follistatin-like 3 (secreted glycoprotein)	Extracellular Space	other	FSTL3
2677356	WNT5A	2	3.28e-10	9.6e-11	996	6.65e-11	65.1519	158.992	2.44033	Cancer, Developmental Disorder, Endocrine System Disorders, Genetic Disorder, Renal and Urological Disease, Reproductive System Disease, Respiratory Disease	wingless-type MMTV integration site family, member 5A	Extracellular Space	other	WNT5A
2460296	AGT	2	4.6e-05	4.44e-05	1054	2.95e-10	64.9198	159.58	2.45811	Antigen Presentation, Cancer, Cardiovascular Disease, Connective Tissue Disorders, Developmental Disorder, Endocrine System Disorders, Gastrointestinal Disease, Genetic Disorder, Hematological Disease, Immunological Disease, Inflammatory Disease, Inflammatory Response, Metabolic Disease, Neurological Disease, Organismal Injury and Abnormalities, Psychological Disorders, Renal and Urological Disea…	angiotensinogen (serpin peptidase inhibitor, clade A, member 8)	Extracellular Space	other	AGT
3097152	MCM4	2	1.12e-05	9.91e-06	1110	1.19e-09	73.8714	160.141	2.16783	Cancer, Gastrointestinal Disease, Genetic Disorder	minichromosome maintenance complex component 4	Nucleus	enzyme	MCM4
3838665	RCN3	2	1.52e-08	4.77e-09	1054	2.95e-10	64.1447	160.84	2.50746		reticulocalbin 3, EF-hand calcium binding domain	Cytoplasm	other	RCN3
3499132	ITGBL1	2	0.000328959	0.000298213	1565	1.7e-05	77.5594	162.826	2.09937	Cancer	integrin, beta-like 1 (with EGF-like repeat domains)	Unknown	other	ITGBL1
2441043	OLFML2B	2	1.46e-05	1.1e-05	1278	5.81e-08	64.0186	163.154	2.54855		olfactomedin-like 2B	Unknown	other	OLFML2B
3168066	CA9	2	8.55e-06	8.09e-06	3975	2.94e-07	437.715	163.361	-2.67944	Cancer, Cardiovascular Disease, Endocrine System Disorders, Genetic Disorder, Infectious Disease, Inflammatory Disease, Metabolic Disease, Neurological Disease, Nutritional Disease, Ophthalmic Disease, Organismal Injury and Abnormalities, Psychological Disorders, Renal and Urological Disease, Reproductive System Disease, Skeletal and Muscular Disorders	carbonic anhydrase IX	Nucleus	enzyme	CA9
2584018	DPP4	2	0.00137349	0.00136308	1564	1.67e-05	93.8693	164.036	1.74749	Antigen Presentation, Cancer, Connective Tissue Disorders, Dermatological Diseases and Conditions, Developmental Disorder, Endocrine System Disorders, Genetic Disorder, Hematological Disease, Hypersensitivity Response, Immunological Disease, Inflammatory Disease, Inflammatory Response, Metabolic Disease, Neurological Disease, Nutritional Disease, Reproductive System Disease, Respiratory Disease, …	dipeptidyl-peptidase 4	Plasma Membrane	peptidase	DPP4
3382698	LRRC32	2	2.24e-06	1.92e-06	1310	1.16e-07	85.164	164.755	1.93456		leucine rich repeat containing 32	Plasma Membrane	other	LRRC32
3050388	DDC	2	0.0422537	0.0422529	1793	0.00065201	101.848	165.447	1.62446	Genetic Disorder, Metabolic Disease, Neurological Disease, Psychological Disorders	dopa decarboxylase (aromatic L-amino acid decarboxylase)	Cytoplasm	enzyme	DDC
2340433	LEPR	2	0.0122758	0.0122758	3651	0.000113805	256.417	167.453	-1.53128	Cancer, Cardiovascular Disease, Connective Tissue Disorders, Developmental Disorder, Endocrine System Disorders, Genetic Disorder, Hematological Disease, Immunological Disease, Inflammatory Disease, Metabolic Disease, Neurological Disease, Nutritional Disease, Psychological Disorders, Reproductive System Disease, Skeletal and Muscular Disorders	leptin receptor	Plasma Membrane	transmembrane receptor	LEPR
3490655	CKAP2	2	1.4e-09	1.08e-09	935	1.31e-11	70.7586	168.196	2.37704	Cancer, Gastrointestinal Disease	cytoskeleton associated protein 2	Cytoplasm	other	CKAP2
3979762	HEPH	2	1.55e-05	1.43e-05	1531	9.23e-06	88.8333	169.626	1.90949		hephaestin	Plasma Membrane	transporter	HEPH
2991860	ITGB8	2	7.66e-11	3.44e-11	1024	1.37e-10	77.646	170.046	2.19002	Cancer, Gastrointestinal Disease, Genetic Disorder, Hematological Disease, Neurological Disease, Reproductive System Disease, Respiratory Disease	integrin, beta 8	Plasma Membrane	other	ITGB8
2946369	HIST1H3G	2	8e-05	7.58e-05	1608	3.58e-05	85.0437	170.241	2.00181		histone cluster 1, H3g	Unknown	other	HIST1H3G
2324919	EPHB2	2	0.00436118	0.0043378	982	4.61e-11	83.0816	170.605	2.05347	Cancer, Cardiovascular Disease, Developmental Disorder, Gastrointestinal Disease, Genetic Disorder, Neurological Disease	EPH receptor B2	Plasma Membrane	kinase	EPHB2
3886223	MYBL2	2	2.22e-06	1.95e-06	1140	2.45e-09	73.0566	171.263	2.34426	Cancer, Connective Tissue Disorders, Infection Mechanism, Skeletal and Muscular Disorders	v-myb myeloblastosis viral oncogene homolog (avian)-like 2	Nucleus	transcription regulator	MYBL2
2709750	SST	2	5.08e-07	2.76e-07	4076	3.34e-08	605.181	171.544	-3.52785	Antigen Presentation, Cancer, Cardiovascular Disease, Endocrine System Disorders, Gastrointestinal Disease, Genetic Disorder, Inflammatory Response, Neurological Disease, Organismal Injury and Abnormalities, Psychological Disorders, Reproductive System Disease	somatostatin	Extracellular Space	other	SST
3167187	PRSS3	2	0.0012409	0.00110069	1821	0.000968873	78.971	171.981	2.17778	Cancer, Inflammatory Response, Neurological Disease, Organismal Injury and Abnormalities, Respiratory Disease	protease, serine, 3	Extracellular Space	peptidase	PRSS3
3775842	TYMS	2	3.99e-09	1.8e-09	1108	1.13e-09	70.0835	173.158	2.47073	Cancer, Dermatological Diseases and Conditions, Gastrointestinal Disease, Genetic Disorder, Hepatic System Disease, Immunological Disease, Infectious Disease, Inflammatory Disease, Neurological Disease, Ophthalmic Disease, Renal and Urological Disease, Reproductive System Disease, Respiratory Disease, Skeletal and Muscular Disorders	thymidylate synthetase	Nucleus	enzyme	TYMS
3880827	GINS1	2	6.14e-07	4.42e-07	1352	2.82e-07	67.5437	173.424	2.56758	Cancer, Reproductive System Disease	GINS complex subunit 1 (Psf1 homolog)	Nucleus	other	GINS1
2784113	CCNA2	2	8.09e-06	7.86e-06	1280	6.07e-08	82.1353	174.983	2.13042	Cancer, Cardiovascular Disease, Connective Tissue Disorders, Gastrointestinal Disease, Genetic Disorder, Renal and Urological Disease, Reproductive System Disease, Respiratory Disease, Skeletal and Muscular Disorders	cyclin A2	Nucleus	other	CCNA2
2454444	NEK2	2	3.18e-07	2.75e-07	1115	1.34e-09	80.5397	175.965	2.18482	Cancer, Endocrine System Disorders, Gastrointestinal Disease, Genetic Disorder, Hepatic System Disease, Reproductive System Disease	NIMA (never in mitosis gene a)-related kinase 2	Nucleus	kinase	NEK2
2893392	LY86	2	0.0198183	0.0197375	2040	0.0145952	127.204	176.085	1.38427	Antigen Presentation, Inflammatory Response	lymphocyte antigen 86	Plasma Membrane	other	LY86
3985717	PLP1	2	0.0477947	0.047787	3475	0.00152305	258.056	178.733	-1.4438	Antigen Presentation, Antimicrobial Response, Cancer, Genetic Disorder, Hematological Disease, Immunological Disease, Inflammatory Disease, Inflammatory Response, Neurological Disease, Organismal Injury and Abnormalities, Psychological Disorders, Reproductive System Disease, Skeletal and Muscular Disorders	proteolipid protein 1	Plasma Membrane	other	PLP1
3610982	DMN	2	0.00999549	0.00980415	3378	0.00526094	334.512	178.93	-1.86951
3744263	AURKB	2	3.01e-07	2.12e-07	1040	2.07e-10	70.5055	180.287	2.55706	Cancer, Connective Tissue Disorders, Dermatological Diseases and Conditions, Genetic Disorder, Hematological Disease, Reproductive System Disease, Respiratory Disease	aurora kinase B	Nucleus	kinase	AURKB
2872848	LOX	2	1.59e-05	1.16e-05	1582	2.29e-05	71.7302	181.604	2.53176	Cancer, Connective Tissue Disorders, Dermatological Diseases and Conditions, Endocrine System Disorders, Genetic Disorder, Reproductive System Disease, Respiratory Disease	lysyl oxidase	Extracellular Space	enzyme	LOX
3910785	AURKA	2	9.92e-08	7.24e-08	1234	2.18e-08	73.9633	183.032	2.47463	Cancer, Connective Tissue Disorders, Endocrine System Disorders, Gastrointestinal Disease, Genetic Disorder, Renal and Urological Disease, Reproductive System Disease, Respiratory Disease	aurora kinase A	Nucleus	kinase	AURKA
2923270	PLN	2	0.0121271	0.0117355	3315	0.0109581	331.231	183.477	-1.8053	Cardiovascular Disease, Developmental Disorder, Genetic Disorder, Organismal Injury and Abnormalities	phospholamban	Cytoplasm	other	PLN
3756591	KRT23	2	0.0413494	0.0396953	1843	0.00131216	27.8588	184.518	6.62333	Cancer, Reproductive System Disease	keratin 23 (histone deacetylase inducible)	Unknown	other	KRT23
3125571	MSR1	2	1.19e-06	1.05e-06	1330	1.78e-07	90.5646	186.064	2.05449	Antigen Presentation, Cancer, Cardiovascular Disease, Genetic Disorder, Hematological Disease, Immunological Disease, Infectious Disease, Inflammatory Response, Organismal Injury and Abnormalities, Reproductive System Disease	macrophage scavenger receptor 1	Plasma Membrane	transmembrane receptor	MSR1
3859946	HSPB6	2	0.0271675	0.0271672	3452	0.00206837	278.539	186.612	-1.49261		heat shock protein, alpha-crystallin-related, B6	Cytoplasm	other	HSPB6
3815143	C19orf21	2	2.84e-05	2.69e-05	1422	1.17e-06	94.79	187.914	1.98243
2845351	LOC25845	2	1.77e-08	1.24e-08	4114	1.42e-08	463.55	190.751	-2.43013
3103818	HNF4G	2	0.0216465	0.0216204	2065	0.0190566	133.183	192.131	1.44261		hepatocyte nuclear factor 4, gamma	Nucleus	transcription regulator	HNF4G
2676182	NT5DC2	2	1.43e-07	1.22e-07	1249	3.06e-08	100.359	193.056	1.92366		5'-nucleotidase domain containing 2	Unknown	other	NT5DC2
2587961	CHN1	2	1.53e-05	1.37e-05	1494	4.67e-06	103.322	194.33	1.88083	Antigen Presentation, Cancer, Genetic Disorder, Inflammatory Response, Neurological Disease	chimerin (chimaerin) 1	Cytoplasm	other	CHN1
3873629	SIRPA	2	9.73e-06	9.11e-06	1534	9.75e-06	117.852	201.464	1.70946	Antigen Presentation, Cancer, Connective Tissue Disorders, Dermatological Diseases and Conditions, Endocrine System Disorders, Genetic Disorder, Hematological Disease, Hypersensitivity Response, Immunological Disease, Infection Mechanism, Inflammatory Disease, Inflammatory Response, Neurological Disease, Skeletal and Muscular Disorders	signal-regulatory protein alpha	Plasma Membrane	phosphatase	SIRPA
2772414	SULT1B1	2	0.000191846	0.000187963	3709	4.39e-05	381.687	202.247	-1.88723		sulfotransferase family, cytosolic, 1B, member 1	Cytoplasm	enzyme	SULT1B1
2835368	CDX1	2	0.000311014	0.000296355	1733	0.000268605	98.1026	203.417	2.07352	Cancer, Connective Tissue Disorders, Gastrointestinal Disease, Inflammatory Disease, Neurological Disease, Skeletal and Muscular Disorders	caudal type homeobox 1	Nucleus	transcription regulator	CDX1
2525989	CPS1	2	0.0246773	0.0244951	1646	6.77e-05	100.239	203.55	2.03065	Genetic Disorder, Metabolic Disease	carbamoyl-phosphate synthetase 1, mitochondrial	Cytoplasm	enzyme	CPS1
2809245	ITGA2	2	2.16e-07	1.84e-07	1189	7.79e-09	97.9086	204.309	2.08673	Cancer, Cardiovascular Disease, Gastrointestinal Disease, Hematological Disease, Hepatic System Disease, Immunological Disease, Inflammatory Response, Neurological Disease, Organismal Injury and Abnormalities, Reproductive System Disease, Respiratory Disease	integrin, alpha 2 (CD49B, alpha 2 subunit of VLA-2 receptor)	Plasma Membrane	other	ITGA2
3333247	FADS2	2	1.76e-07	7.12e-08	1120	1.51e-09	80.4317	204.807	2.54635		fatty acid desaturase 2	Plasma Membrane	enzyme	FADS2
3039671	SOSTDC1	2	1.54e-06	1.25e-06	4029	9.37e-08	574.198	206.752	-2.77724		sclerostin domain containing 1	Extracellular Space	other	SOSTDC1
2946345	HIST1H2BG	2	0.000505419	0.00049741	1633	5.45e-05	123.087	211.456	1.71794		histone cluster 1, H2bg	Nucleus	other	HIST1H2BG
3569257	PLEK2	2	2.66e-05	2.55e-05	1629	5.1e-05	123.379	212.879	1.72541	Cancer, Gastrointestinal Disease, Genetic Disorder	pleckstrin 2	Unknown	other	PLEK2
3257204	IFIT3	2	0.0261545	0.0259612	2046	0.0155724	148.722	215.548	1.44933	Cancer, Organismal Injury and Abnormalities, Reproductive System Disease	interferon-induced protein with tetratricopeptide repeats 3	Cytoplasm	other	IFIT3
3409605	MLSTD1	2	1.35e-06	9.08e-07	1236	2.28e-08	99.1	216.522	2.18488
3360401	HBB	2	0.00573543	0.00534008	3637	0.000142203	442.917	217.295	-2.03832	Genetic Disorder, Hematological Disease, Inflammatory Disease, Organismal Injury and Abnormalities, Respiratory Disease, Skeletal and Muscular Disorders	hemoglobin, beta	Cytoplasm	transporter	HBB
2601414	SERPINE2	2	3.29e-06	2.44e-06	1279	5.94e-08	102.106	219.033	2.14516	Cardiovascular Disease, Genetic Disorder, Neurological Disease, Organismal Injury and Abnormalities, Reproductive System Disease, Skeletal and Muscular Disorders	serpin peptidase inhibitor, clade E (nexin, plasminogen activator inhibitor type 1), member 2	Extracellular Space	other	SERPINE2
3239891	PDSS1	2	4.11e-05	3.83e-05	1308	1.11e-07	117.003	219.744	1.87811	Genetic Disorder, Metabolic Disease	prenyl (decaprenyl) diphosphate synthase, subunit 1	Unknown	enzyme	PDSS1
3232979	AKR1C1	2	0.0228252	0.0227099	3277	0.0166066	344.586	222.638	-1.54774	Cancer, Gastrointestinal Disease	aldo-keto reductase family 1, member C1 (dihydrodiol dehydrogenase 1; 20-alpha (3-alpha)-hydroxysteroid dehydrogenase)	Cytoplasm	enzyme	AKR1C1
3853108	NOTCH3	2	1.8e-06	1.64e-06	1127	1.79e-09	119.191	227.387	1.90776	Cancer, Genetic Disorder, Hematological Disease, Reproductive System Disease	Notch homolog 3 (Drosophila)	Plasma Membrane	transcription regulator	NOTCH3
3040518	7A5	2	6.76e-08	4.06e-08	1383	5.34e-07	104.647	229.598	2.19401
3373845	SLC43A3	2	3.59e-07	3.5e-07	1207	1.18e-08	125.616	237.025	1.8869		solute carrier family 43, member 3	Extracellular Space	other	SLC43A3
3933039	TMPRSS2	2	6.19e-06	5.21e-06	3718	3.77e-05	417.917	239.33	-1.7462		transmembrane protease, serine 2	Plasma Membrane	peptidase	TMPRSS2
3997825	MXRA5	2	1.57e-09	4.5e-10	948	1.86e-11	105.518	243.794	2.31044	Cancer, Genetic Disorder, Reproductive System Disease	matrix-remodelling associated 5	Unknown	other	MXRA5
3252036	PLAU	2	1.11e-08	4.95e-09	926	1.03e-11	83.4945	245.505	2.94037	Antigen Presentation, Cancer, Cardiovascular Disease, Connective Tissue Disorders, Dermatological Diseases and Conditions, Developmental Disorder, Endocrine System Disorders, Gastrointestinal Disease, Genetic Disorder, Hematological Disease, Hepatic System Disease, Hypersensitivity Response, Infection Mechanism, Inflammatory Disease, Inflammatory Response, Neurological Disease, Ophthalmic Disease…	plasminogen activator, urokinase	Extracellular Space	peptidase	PLAU
2371139	LAMC2	2	6.14e-08	3.12e-08	1095	8.21e-10	95.6474	246.006	2.57201	Cancer, Dermatological Diseases and Conditions, Genetic Disorder, Immunological Disease	laminin, gamma 2	Extracellular Space	other	LAMC2
3643966	CRAMP1L	2	0.00198335	0.00197527	3548	0.000548319	427.886	249.843	-1.71262		Crm, cramped-like (Drosophila)	Unknown	other	CRAMP1L
2947081	HIST1H4L	2	0.000728114	0.000717455	1484	3.87e-06	119.019	250.46	2.10438		histone cluster 1, H4l	Unknown	other	HIST1H4L
2672140	LTF	2	0.000299125	0.000247846	3665	9.08e-05	737.103	251.655	-2.92902	Antigen Presentation, Cancer, Connective Tissue Disorders, Genetic Disorder, Hematological Disease, Immunological Disease, Infection Mechanism, Infectious Disease, Inflammatory Disease, Inflammatory Response, Reproductive System Disease, Respiratory Disease, Skeletal and Muscular Disorders	lactotransferrin	Extracellular Space	peptidase	LTF
3911217	TMEPAI	2	1.72e-08	1.37e-08	908	6.3e-12	109.025	252.404	2.3151
2399743	AKR7A3	2	6.52e-08	4.07e-08	3950	4.92e-07	620.137	253.629	-2.44505		aldo-keto reductase family 7, member A3 (aflatoxin aldehyde reductase)	Cytoplasm	enzyme	AKR7A3
2516023	CDCA7	2	0.00016493	0.000152626	1339	2.15e-07	116.441	256.082	2.19924	Cancer, Connective Tissue Disorders, Gastrointestinal Disease, Genetic Disorder	cell division cycle associated 7	Nucleus	other	CDCA7
3164312	ASAH3L	2	0.000168606	0.000163795	3755	1.99e-05	473.943	257.194	-1.84275		N-acylsphingosine amidohydrolase 3-like	Unknown	other	ASAH3L
2807359	OSMR	2	2.21e-06	2.03e-06	1281	6.2e-08	131.094	259.103	1.97646	Cancer, Dermatological Diseases and Conditions, Genetic Disorder, Hematological Disease, Immunological Disease, Inflammatory Disease, Metabolic Disease	oncostatin M receptor	Plasma Membrane	transmembrane receptor	OSMR
2957342	GSTA1	2	2.65e-06	2.02e-06	3989	2.2e-07	663.099	264.678	-2.5053	Reproductive System Disease	glutathione S-transferase A1	Cytoplasm	enzyme	GSTA1
3173508	PGM5	2	0.016782	0.0165855	3351	0.00725447	425.218	264.852	-1.60549		phosphoglucomutase 5	Cytoplasm	enzyme	PGM5
3921992	FAM3B	2	6.65e-06	6.6e-06	3879	2.02e-06	485.27	265.07	-1.83073	Cancer, Genetic Disorder, Reproductive System Disease	family with sequence similarity 3, member B	Extracellular Space	cytokine	FAM3B
2353988	FAM46C	2	0.00340584	0.00338457	3472	0.00158576	394.823	268.672	-1.46954		family with sequence similarity 46, member C	Extracellular Space	other	FAM46C
3924144	COL18A1	2	2.39e-08	2.16e-08	1182	6.62e-09	146.171	270.562	1.851	Cancer, Cardiovascular Disease, Dermatological Diseases and Conditions, Gastrointestinal Disease, Genetic Disorder, Hematological Disease, Ophthalmic Disease, Organismal Injury and Abnormalities, Renal and Urological Disease, Reproductive System Disease, Respiratory Disease	collagen, type XVIII, alpha 1	Extracellular Space	other	COL18A1
3601229	CD276	2	6.27e-13	4.4e-13	902	5.34e-12	131.696	270.589	2.05464	Antigen Presentation, Connective Tissue Disorders, Genetic Disorder, Immunological Disease, Inflammatory Response, Neurological Disease, Organismal Injury and Abnormalities, Skeletal and Muscular Disorders	CD276 molecule	Plasma Membrane	other	CD276
3394315	C1QTNF5	2	6.19e-07	3.68e-07	1354	2.94e-07	138.858	274.893	1.97967	Genetic Disorder, Ophthalmic Disease	C1q and tumor necrosis factor related protein 5	Plasma Membrane	transmembrane receptor	C1QTNF5
3908358	SULF2	2	1.06e-08	9.16e-09	1141	2.51e-09	139.693	276.107	1.97653		sulfatase 2	Extracellular Space	enzyme	SULF2
3874438	CDC25B	2	1.47e-06	1.45e-06	997	6.82e-11	136.419	281.703	2.06499	Cancer, Connective Tissue Disorders, Dermatological Diseases and Conditions, Gastrointestinal Disease, Genetic Disorder, Inflammatory Disease, Reproductive System Disease, Skeletal and Muscular Disorders	cell division cycle 25 homolog B (S. pombe)	Nucleus	phosphatase	CDC25B
2498911	SULT1C2	2	0.000374045	0.000371076	3633	0.000151468	491.399	286.611	-1.71452	Cancer, Gastrointestinal Disease, Genetic Disorder	sulfotransferase family, cytosolic, 1C, member 2	Cytoplasm	enzyme	SULT1C2
2794408	HPGD	2	0.000204608	0.00019775	3753	2.06e-05	540.589	287.382	-1.88108	Cancer, Gastrointestinal Disease, Genetic Disorder, Inflammatory Disease, Reproductive System Disease	hydroxyprostaglandin dehydrogenase 15-(NAD)	Cytoplasm	enzyme	HPGD
3455426	KRT6B	2	0.0106258	0.00988146	1383	5.34e-07	48.6152	287.601	5.91586	Dermatological Diseases and Conditions, Genetic Disorder	keratin 6B	Cytoplasm	other	KRT6B
2652675	ECT2	2	3.36e-08	2.1e-08	1120	1.51e-09	117.595	290.239	2.46812	Cancer, Endocrine System Disorders, Genetic Disorder, Reproductive System Disease	epithelial cell transforming sequence 2 oncogene	Nucleus	other	ECT2
2773958	CXCL10	2	0.000603707	0.00052956	1677	0.000111997	131.682	290.473	2.20587	Antigen Presentation, Antimicrobial Response, Cancer, Connective Tissue Disorders, Gastrointestinal Disease, Genetic Disorder, Hematological Disease, Hepatic System Disease, Hypersensitivity Response, Immunological Disease, Infection Mechanism, Infectious Disease, Inflammatory Disease, Inflammatory Response, Neurological Disease, Organismal Injury and Abnormalities, Reproductive System Disease, R…	chemokine (C-X-C motif) ligand 10	Extracellular Space	cytokine	CXCL10
3835879	APOE	2	1.4e-06	1.1e-06	1389	6.03e-07	150.22	295.211	1.9652	Antigen Presentation, Cancer, Cardiovascular Disease, Connective Tissue Disorders, Dermatological Diseases and Conditions, Developmental Disorder, Endocrine System Disorders, Gastrointestinal Disease, Genetic Disorder, Hematological Disease, Hepatic System Disease, Immunological Disease, Infection Mechanism, Infectious Disease, Inflammatory Disease, Inflammatory Response, Metabolic Disease, Neuro…	apolipoprotein E	Extracellular Space	transporter	APOE
2702752	RARRES1	2	0.00336043	0.00299742	1354	2.94e-07	100.693	296.984	2.9494	Cancer, Reproductive System Disease	retinoic acid receptor responder (tazarotene induced) 1	Plasma Membrane	other	RARRES1
2948205	TRIM31	2	0.000229438	0.00021067	1780	0.000540411	163.66	301.676	1.8433		tripartite motif-containing 31	Unknown	other	TRIM31
3896200	PCNA	2	1.3e-06	1.07e-06	1355	3e-07	164.072	305.224	1.8603	Cancer, Gastrointestinal Disease, Genetic Disorder, Hematological Disease, Hepatic System Disease, Neurological Disease, Reproductive System Disease, Respiratory Disease	proliferating cell nuclear antigen	Nucleus	other	PCNA
3645555	TNFRSF12A	2	4.18e-07	4.04e-07	1207	1.18e-08	157.627	311.365	1.97533	Cancer, Cardiovascular Disease, Organismal Injury and Abnormalities	tumor necrosis factor receptor superfamily, member 12A	Plasma Membrane	other	TNFRSF12A
2402459	STMN1	2	7.75e-06	6.98e-06	1268	4.66e-08	153.47	313.515	2.04284	Cancer, Connective Tissue Disorders, Genetic Disorder, Hematological Disease, Inflammatory Disease, Neurological Disease, Organismal Injury and Abnormalities, Reproductive System Disease	stathmin 1/oncoprotein 18	Cytoplasm	other	STMN1
3274758	AKR1C2	2	0.000229297	0.00020049	3619	0.000188571	675.678	313.893	-2.15257	Cancer, Gastrointestinal Disease, Hepatic System Disease, Reproductive System Disease	aldo-keto reductase family 1, member C2 (dihydrodiol dehydrogenase 2; bile acid binding protein; 3-alpha hydroxysteroid dehydrogenase, type III)	Cytoplasm	enzyme	AKR1C2
3721452	FKBP10	2	5.8e-06	3.11e-06	1024	1.37e-10	114.857	314.267	2.73616		FK506 binding protein 10, 65 kDa	Cytoplasm	enzyme	FKBP10
2838201	PTTG1	2	4.42e-05	4.02e-05	1232	2.09e-08	145.739	314.758	2.15974	Antigen Presentation, Cancer, Connective Tissue Disorders, Developmental Disorder, Endocrine System Disorders, Gastrointestinal Disease, Genetic Disorder, Hematological Disease, Immunological Disease, Infectious Disease, Inflammatory Response, Metabolic Disease, Neurological Disease, Reproductive System Disease, Respiratory Disease, Skeletal and Muscular Disorders	pituitary tumor-transforming 1	Nucleus	transcription regulator	PTTG1
2987632	TTYH3	2	2.57e-10	1.49e-10	945	1.72e-11	157.205	319.67	2.03346		tweety homolog 3 (Drosophila)	Plasma Membrane	ion channel	TTYH3
2835715	GPX3	2	0.0438956	0.0436566	3896	1.45e-06	485.843	335.967	-1.4461	Cancer, Cardiovascular Disease, Developmental Disorder, Genetic Disorder, Reproductive System Disease	glutathione peroxidase 3 (plasma)	Extracellular Space	enzyme	GPX3
2414958	TACSTD2	2	0.000540718	0.000508575	1847	0.00138551	194.912	336.543	1.72664	Cancer, Genetic Disorder, Metabolic Disease, Reproductive System Disease	tumor-associated calcium signal transducer 2	Plasma Membrane	other	TACSTD2
2881239	PDGFRB	2	1.24e-07	8.03e-08	1209	1.24e-08	158.251	338.048	2.13616	Cancer, Cardiovascular Disease, Dermatological Diseases and Conditions, Endocrine System Disorders, Gastrointestinal Disease, Genetic Disorder, Hematological Disease, Hepatic System Disease, Immunological Disease, Inflammatory Disease, Metabolic Disease, Neurological Disease, Ophthalmic Disease, Organismal Injury and Abnormalities, Renal and Urological Disease, Reproductive System Disease, Respir…	platelet-derived growth factor receptor, beta polypeptide	Plasma Membrane	kinase	PDGFRB
3580769	CKB	2	3.59e-08	2.26e-08	4268	3.52e-10	846.007	339.913	-2.48889	Genetic Disorder, Neurological Disease	creatine kinase, brain	Cytoplasm	kinase	CKB
3230282	AGPAT2	2	0.0165656	0.0165332	1739	0.000294202	246.853	340.349	1.37875	Cancer, Endocrine System Disorders, Genetic Disorder, Metabolic Disease, Renal and Urological Disease, Reproductive System Disease	1-acylglycerol-3-phosphate O-acyltransferase 2 (lysophosphatidic acid acyltransferase, beta)	Cytoplasm	enzyme	AGPAT2
2469252	RRM2	2	9.16e-06	8.75e-06	1263	4.17e-08	169.637	346.013	2.03973	Cancer, Cardiovascular Disease, Dermatological Diseases and Conditions, Gastrointestinal Disease, Genetic Disorder, Hematological Disease, Immunological Disease, Infectious Disease, Inflammatory Disease, Metabolic Disease, Neurological Disease, Organismal Injury and Abnormalities, Renal and Urological Disease, Reproductive System Disease, Respiratory Disease, Skeletal and Muscular Disorders	ribonucleotide reductase M2 polypeptide	Nucleus	enzyme	RRM2
3868768	KLK6	2	0.025072	0.0236358	1523	7.98e-06	41.2013	346.966	8.42123	Cancer, Dermatological Diseases and Conditions, Gastrointestinal Disease, Genetic Disorder, Reproductive System Disease	kallikrein-related peptidase 6	Extracellular Space	peptidase	KLK6
2947095	HIST1H3J	2	0.000173608	0.000143872	1603	3.29e-05	145.492	347.184	2.38628		histone cluster 1, H3j	Unknown	other	HIST1H3J
2899756	HIST1H2AG	2	9.03e-05	8.38e-05	1541	1.11e-05	178.98	350.609	1.95892		histone cluster 1, H2ag	Nucleus	other	HIST1H2AG
2434609	CTSK	2	9.1e-05	8.32e-05	1678	0.000113805	197.892	350.69	1.77213	Cancer, Developmental Disorder, Genetic Disorder, Hematological Disease, Skeletal and Muscular Disorders	cathepsin K	Cytoplasm	peptidase	CTSK
2899768	HIST1H4I	2	4.27e-06	3.91e-06	1495	4.75e-06	212.291	363.851	1.71392		histone cluster 1, H4i	Unknown	other	HIST1H4I
3301263	SORBS1	2	0.029413	0.0294028	3479	0.001443	522.257	369.281	-1.41425	Genetic Disorder, Nutritional Disease, Reproductive System Disease	sorbin and SH3 domain containing 1	Plasma Membrane	other	SORBS1
3630668	CALML4	2	0.00328852	0.00321937	1905	0.00297174	225.606	371.983	1.64881		calmodulin-like 4	Unknown	other	CALML4
3821263	CNN1	2	0.048339	0.0482437	3249	0.022271	580.955	374.623	-1.55077	Cancer, Cardiovascular Disease, Hematological Disease	calponin 1, basic, smooth muscle	Cytoplasm	other	CNN1
2818517	VCAN	2	2.88e-07	1.59e-07	1161	4.04e-09	159.159	380.991	2.39378	Cancer, Endocrine System Disorders, Genetic Disorder, Neurological Disease, Ophthalmic Disease, Reproductive System Disease	versican	Extracellular Space	other	VCAN
3694657	CDH11	2	1.51e-09	5.83e-10	988	5.39e-11	155.212	386.854	2.49242	Cancer, Reproductive System Disease	cadherin 11, type 2, OB-cadherin (osteoblast)	Plasma Membrane	other	CDH11
2816459	F2R	2	5.66e-09	3.55e-09	1053	2.88e-10	177.69	390.283	2.19643	Antigen Presentation, Cancer, Cardiovascular Disease, Connective Tissue Disorders, Developmental Disorder, Gastrointestinal Disease, Genetic Disorder, Hematological Disease, Hypersensitivity Response, Inflammatory Disease, Inflammatory Response, Neurological Disease, Organismal Injury and Abnormalities, Reproductive System Disease, Respiratory Disease	coagulation factor II (thrombin) receptor	Plasma Membrane	G-protein coupled receptor	F2R
3351200	TMPRSS4	2	2.89e-05	2.31e-05	1579	2.17e-05	189.786	395.608	2.08449		transmembrane protease, serine 4	Plasma Membrane	peptidase	TMPRSS4
4014191	POF1B	2	0.000297536	0.000263753	1933	0.00422231	237.961	398.147	1.67316	Genetic Disorder, Reproductive System Disease	premature ovarian failure, 1B	Plasma Membrane	other	POF1B
3193482	COL5A1	2	6.65e-09	2.09e-09	1063	3.7e-10	167.091	402.484	2.40877	Connective Tissue Disorders, Dermatological Diseases and Conditions, Genetic Disorder, Skeletal and Muscular Disorders	collagen, type V, alpha 1	Extracellular Space	other	COL5A1
2955827	PLA2G7	2	3.72e-09	1.75e-09	1089	7.08e-10	156.148	407.044	2.60679	Antigen Presentation, Cancer, Cardiovascular Disease, Genetic Disorder, Hematological Disease, Hypersensitivity Response, Immunological Disease, Inflammatory Disease, Inflammatory Response, Neurological Disease, Respiratory Disease	phospholipase A2, group VII (platelet-activating factor acetylhydrolase, plasma)	Extracellular Space	enzyme	PLA2G7
2999755	AEBP1	2	8.39e-05	7.45e-05	1815	0.00089088	247.192	418.215	1.69187	Genetic Disorder, Neurological Disease	AE binding protein 1	Nucleus	peptidase	AEBP1
2591643	COL5A2	2	7.84e-09	2.02e-09	889	3.73e-12	149.48	424.413	2.83926	Cardiovascular Disease, Connective Tissue Disorders, Dermatological Diseases and Conditions, Genetic Disorder, Metabolic Disease, Skeletal and Muscular Disorders	collagen, type V, alpha 2	Extracellular Space	other	COL5A2
2813414	CCNB1	2	4.82e-07	3.59e-07	1379	4.92e-07	177.1	426.102	2.40599	Cancer, Connective Tissue Disorders, Gastrointestinal Disease, Genetic Disorder, Hematological Disease, Immunological Disease, Inflammatory Disease, Renal and Urological Disease, Reproductive System Disease, Respiratory Disease, Skeletal and Muscular Disorders	cyclin B1	Nucleus	other	CCNB1
2731381	CXCL1	2	9.39e-07	6.04e-07	1204	1.1e-08	157.615	432.708	2.74534	Antigen Presentation, Cancer, Connective Tissue Disorders, Dermatological Diseases and Conditions, Gastrointestinal Disease, Genetic Disorder, Hematological Disease, Hepatic System Disease, Immunological Disease, Infection Mechanism, Infectious Disease, Inflammatory Disease, Inflammatory Response, Neurological Disease, Organismal Injury and Abnormalities, Skeletal and Muscular Disorders	chemokine (C-X-C motif) ligand 1 (melanoma growth stimulating activity, alpha)	Extracellular Space	cytokine	CXCL1
2487082	ANTXR1	2	6.93e-07	5.66e-07	1419	1.1e-06	249.359	439.308	1.76175	Cancer, Gastrointestinal Disease, Genetic Disorder, Organismal Injury and Abnormalities, Reproductive System Disease	anthrax toxin receptor 1	Plasma Membrane	other	ANTXR1
3016148	SERPINE1	2	0.000125208	0.000107361	1567	1.76e-05	203.555	450.503	2.21318	Cancer, Cardiovascular Disease, Developmental Disorder, Endocrine System Disorders, Gastrointestinal Disease, Genetic Disorder, Hematological Disease, Infectious Disease, Inflammatory Disease, Inflammatory Response, Metabolic Disease, Neurological Disease, Nutritional Disease, Organismal Injury and Abnormalities, Renal and Urological Disease, Reproductive System Disease, Respiratory Disease, Skel…	serpin peptidase inhibitor, clade E (nexin, plasminogen activator inhibitor type 1), member 1	Extracellular Space	other	SERPINE1
2751009	ANXA10	2	1.42e-05	1.32e-05	3783	1.21e-05	934.094	451.318	-2.0697	Cancer, Reproductive System Disease	annexin A10	Unknown	other	ANXA10
3062082	PDK4	2	0.00101715	0.000972057	3522	0.000795927	817.197	454.735	-1.79709	Cancer, Reproductive System Disease	pyruvate dehydrogenase kinase, isozyme 4	Cytoplasm	kinase	PDK4
3214845	ASPN	2	6.32e-05	5.88e-05	1423	1.19e-06	215.678	469.322	2.17603	Connective Tissue Disorders, Genetic Disorder, Inflammatory Disease, Skeletal and Muscular Disorders	asporin	Extracellular Space	other	ASPN
3718902	CCL18	2	0.000448093	0.000392253	1588	2.54e-05	212.546	493.2	2.32044	Antigen Presentation, Connective Tissue Disorders, Genetic Disorder, Immunological Disease, Inflammatory Disease, Inflammatory Response, Reproductive System Disease, Skeletal and Muscular Disorders	chemokine (C-C motif) ligand 18 (pulmonary and activation-regulated)	Extracellular Space	cytokine	CCL18
2321182	PDPN	2	6.71e-08	3.42e-08	1249	3.06e-08	231.849	506.698	2.18547	Cancer, Gastrointestinal Disease, Genetic Disorder, Inflammatory Response, Organismal Injury and Abnormalities, Reproductive System Disease	podoplanin	Plasma Membrane	transporter	PDPN
2773369	CXCL5	2	0.00174425	0.00168222	1739	0.000294202	249.48	537.427	2.15419	Antigen Presentation, Cancer, Connective Tissue Disorders, Genetic Disorder, Hematological Disease, Immunological Disease, Infectious Disease, Inflammatory Disease, Inflammatory Response, Reproductive System Disease, Skeletal and Muscular Disorders	chemokine (C-X-C motif) ligand 5	Extracellular Space	cytokine	CXCL5
3601511	ISLR	2	0.000238427	0.000216837	1854	0.00152305	317.173	553.978	1.74661	Cancer, Gastrointestinal Disease	immunoglobulin superfamily containing leucine-rich repeat	Extracellular Space	other	ISLR
3061997	PON2	2	5.15e-07	4.83e-07	1165	4.44e-09	301.552	561.973	1.8636	Antigen Presentation, Inflammatory Response	paraoxonase 2	Extracellular Space	enzyme	PON2
3528864	MMP14	2	2.08e-10	6.65e-11	917	8.05e-12	250.591	562.197	2.24349	Antigen Presentation, Cancer, Cardiovascular Disease, Connective Tissue Disorders, Genetic Disorder, Immunological Disease, Inflammatory Disease, Inflammatory Response, Neurological Disease, Organismal Injury and Abnormalities, Renal and Urological Disease, Reproductive System Disease, Respiratory Disease, Skeletal and Muscular Disorders	matrix metallopeptidase 14 (membrane-inserted)	Extracellular Space	peptidase	MMP14
2947877	UBD	2	0.00116365	0.00112049	1663	8.94e-05	281.865	563.397	1.99882	Cancer, Connective Tissue Disorders, Gastrointestinal Disease, Hematological Disease, Immunological Disease	ubiquitin D	Nucleus	other	UBD
3405587	GPRC5A	2	3.16e-08	2.16e-08	1161	4.04e-09	222.897	577.112	2.58914	Cancer, Genetic Disorder, Reproductive System Disease	G protein-coupled receptor, family C, group 5, member A	Plasma Membrane	G-protein coupled receptor	GPRC5A
2900074	HIST1H2BN	2	7.57e-07	4.2e-07	1435	1.51e-06	273.553	628.782	2.29858		histone cluster 1, H2bn	Nucleus	other	HIST1H2BN
2570193	MALL	2	0.0249733	0.0249655	1395	6.81e-07	415.027	633.278	1.52587		mal, T-cell differentiation protein-like	Plasma Membrane	other	MALL
3596147	GCNT3	2	0.000513413	0.000469881	1943	0.00477374	334.74	635.504	1.8985		glucosaminyl (N-acetyl) transferase 3, mucin type	Plasma Membrane	enzyme	GCNT3
2400027	PLA2G2A	2	0.00642079	0.0063553	1692	0.000142203	340.133	638.539	1.87732	Antigen Presentation, Cancer, Gastrointestinal Disease, Genetic Disorder, Hematological Disease, Infectious Disease, Inflammatory Disease, Inflammatory Response, Respiratory Disease	phospholipase A2, group IIA (platelets, synovial fluid)	Extracellular Space	enzyme	PLA2G2A
2731332	IL8	2	0.00103362	0.00102468	1499	5.12e-06	312.473	644.053	2.06115	Antigen Presentation, Cancer, Cardiovascular Disease, Connective Tissue Disorders, Dermatological Diseases and Conditions, Endocrine System Disorders, Gastrointestinal Disease, Genetic Disorder, Hematological Disease, Hepatic System Disease, Hypersensitivity Response, Immunological Disease, Infection Mechanism, Infectious Disease, Inflammatory Disease, Inflammatory Response, Metabolic Disease, Ne…	interleukin 8	Extracellular Space	cytokine	IL8
2946215	HIST1H3B	2	1.83e-06	1.59e-06	1359	3.26e-07	292.156	652.113	2.23207		histone cluster 1, H3b	Nucleus	other	HIST1H3B
2717078	S100P	2	4.33e-05	4.04e-05	3567	0.000415037	1156.24	659.961	-1.75198	Cancer, Connective Tissue Disorders, Endocrine System Disorders, Genetic Disorder, Infectious Disease, Reproductive System Disease, Respiratory Disease	S100 calcium binding protein P	Cytoplasm	other	S100P
3525313	COL4A1	2	2.74e-09	2.43e-09	1128	1.84e-09	338.76	664.865	1.96264	Antigen Presentation, Cancer, Cardiovascular Disease, Dermatological Diseases and Conditions, Endocrine System Disorders, Gastrointestinal Disease, Genetic Disorder, Hematological Disease, Inflammatory Response, Metabolic Disease, Neurological Disease, Reproductive System Disease	collagen, type IV, alpha 1	Extracellular Space	other	COL4A1
3340589	SERPINH1	2	4.89e-09	3.49e-09	910	6.65e-12	292.335	665.503	2.27651	Genetic Disorder, Reproductive System Disease	serpin peptidase inhibitor, clade H (heat shock protein 47), member 1, (collagen binding protein 1)	Extracellular Space	other	SERPINH1
3986647	VSIG1	2	3.62e-07	3.09e-07	3846	3.79e-06	1596	714.226	-2.23459		V-set and immunoglobulin domain containing 1	Unknown	other	VSIG1
2779271	ADH1C	2	9.24e-05	9.24e-05	3810	7.42e-06	1272.69	732.229	-1.73811	Cancer, Gastrointestinal Disease, Genetic Disorder, Hepatic System Disease, Neurological Disease, Respiratory Disease	alcohol dehydrogenase 1C (class I), gamma polypeptide	Cytoplasm	enzyme	ADH1C
2779199	ADH1A	2	0.00102969	0.00102933	3851	3.45e-06	1280.51	789.312	-1.62231	Cancer, Skeletal and Muscular Disorders	alcohol dehydrogenase 1A (class I), alpha polypeptide	Cytoplasm	enzyme	ADH1A
2480961	TACSTD1	2	0.000313461	0.000312882	1519	7.42e-06	452.722	791.17	1.74758	Cancer, Endocrine System Disorders, Gastrointestinal Disease, Genetic Disorder, Renal and Urological Disease, Reproductive System Disease, Respiratory Disease	tumor-associated calcium signal transducer 1	Plasma Membrane	other	TACSTD1
2605321	COL6A3	2	3.44e-08	1.76e-08	1209	1.24e-08	341.619	806.655	2.36127	Cancer, Dermatological Diseases and Conditions, Gastrointestinal Disease, Genetic Disorder, Reproductive System Disease, Skeletal and Muscular Disorders	collagen, type VI, alpha 3	Extracellular Space	other	COL6A3
2992814	GPNMB	2	5.23e-05	4.63e-05	1752	0.000357702	494.486	837.399	1.69347	Ophthalmic Disease	glycoprotein (transmembrane) nmb	Plasma Membrane	enzyme	GPNMB
3587553	GREM1	2	7.43e-05	6.8e-05	1570	1.85e-05	444.555	846.792	1.90481	Antigen Presentation, Cancer, Gastrointestinal Disease, Inflammatory Response, Reproductive System Disease	gremlin 1, cysteine knot superfamily, homolog (Xenopus laevis)	Extracellular Space	other	GREM1
3209726	ALDH1A1	2	1.58e-05	1.56e-05	3839	4.33e-06	1445.37	875.867	-1.65021	Cancer, Connective Tissue Disorders, Developmental Disorder, Endocrine System Disorders, Genetic Disorder, Hematological Disease, Metabolic Disease, Neurological Disease, Psychological Disorders, Reproductive System Disease, Skeletal and Muscular Disorders	aldehyde dehydrogenase 1 family, member A1	Cytoplasm	enzyme	ALDH1A1
3815243	CFD	2	0.00117961	0.00117777	3785	1.17e-05	1454.52	888.346	-1.63734	Cancer, Genetic Disorder, Neurological Disease, Renal and Urological Disease	complement factor D (adipsin)	Extracellular Space	peptidase	CFD
3105600	CA2	2	1.52e-08	1.3e-08	4047	6.34e-08	2166.09	951.827	-2.27571	Cancer, Cardiovascular Disease, Developmental Disorder, Endocrine System Disorders, Gastrointestinal Disease, Genetic Disorder, Hepatic System Disease, Infectious Disease, Inflammatory Disease, Metabolic Disease, Neurological Disease, Nutritional Disease, Ophthalmic Disease, Organismal Injury and Abnormalities, Psychological Disorders, Renal and Urological Disease, Reproductive System Disease, Sk…	carbonic anhydrase II	Cytoplasm	enzyme	CA2
2770469	IGFBP7	2	9.35e-05	9.09e-05	1569	1.82e-05	634.246	1053.31	1.66073	Cancer, Connective Tissue Disorders, Endocrine System Disorders, Gastrointestinal Disease, Genetic Disorder, Immunological Disease, Inflammatory Disease, Metabolic Disease, Reproductive System Disease, Skeletal and Muscular Disorders	insulin-like growth factor binding protein 7	Extracellular Space	transporter	IGFBP7
3119339	LY6E	2	3.62e-06	2.02e-06	1209	1.24e-08	463.579	1081.83	2.33364	Cancer, Genetic Disorder, Reproductive System Disease	lymphocyte antigen 6 complex, locus E	Plasma Membrane	other	LY6E
3834341	CEACAM5	2	0.000165042	0.000141877	1879	0.0021234	587.273	1211.28	2.06254	Antigen Presentation, Cancer, Gastrointestinal Disease, Inflammatory Response	carcinoembryonic antigen-related cell adhesion molecule 5	Plasma Membrane	other	CEACAM5
2692883	MUC13	2	0.000330498	0.00031481	1755	0.000374074	667.524	1232.23	1.84597	Cancer, Gastrointestinal Disease, Genetic Disorder	mucin 13, cell surface associated	Extracellular Space	other	MUC13
3848039	C3	2	0.00121852	0.00117867	1867	0.00181236	721.32	1239.01	1.7177	Antigen Presentation, Antimicrobial Response, Cancer, Cardiovascular Disease, Connective Tissue Disorders, Developmental Disorder, Endocrine System Disorders, Gastrointestinal Disease, Genetic Disorder, Hematological Disease, Hepatic System Disease, Hypersensitivity Response, Immunological Disease, Infectious Disease, Inflammatory Disease, Inflammatory Response, Metabolic Disease, Neurological Di…	complement component 3	Extracellular Space	peptidase	C3
2598261	FN1	2	0.00042276	0.000420529	1589	2.58e-05	711.674	1240.47	1.74303	Antigen Presentation, Cancer, Cardiovascular Disease, Connective Tissue Disorders, Dermatological Diseases and Conditions, Endocrine System Disorders, Gastrointestinal Disease, Genetic Disorder, Hematological Disease, Hypersensitivity Response, Immunological Disease, Infection Mechanism, Infectious Disease, Inflammatory Disease, Inflammatory Response, Metabolic Disease, Neurological Disease, Nutr…	fibronectin 1	Plasma Membrane	enzyme	FN1
3662106	MT1A	2	0.00553292	0.00548124	3777	1.35e-05	2305.39	1249.28	-1.84538	Cancer, Cardiovascular Disease, Gastrointestinal Disease, Skeletal and Muscular Disorders	metallothionein 1A	Cytoplasm	other	MT1A
3589458	THBS1	2	0.0375162	0.0374765	2133	0.0376838	939.592	1291.01	1.37401	Antigen Presentation, Cancer, Cardiovascular Disease, Connective Tissue Disorders, Dermatological Diseases and Conditions, Genetic Disorder, Hematological Disease, Immunological Disease, Inflammatory Disease, Inflammatory Response, Metabolic Disease, Ophthalmic Disease, Organismal Injury and Abnormalities, Renal and Urological Disease, Reproductive System Disease, Respiratory Disease, Skeletal an…	thrombospondin 1	Extracellular Space	other	THBS1
2947073	HIST1H1B	2	2.74e-07	2.19e-07	1390	6.15e-07	683.826	1393.22	2.0374		histone cluster 1, H1b	Nucleus	other	HIST1H1B
3824874	IFI30	2	2.02e-07	1.35e-07	1319	1.41e-07	774.286	1512.79	1.95378	Antigen Presentation, Cancer, Dermatological Diseases and Conditions, Genetic Disorder, Immunological Disease, Inflammatory Disease, Inflammatory Response, Reproductive System Disease, Respiratory Disease	interferon, gamma-inducible protein 30	Cytoplasm	enzyme	IFI30
3631964	PKM2	2	7.47e-09	2.85e-09	1031	1.64e-10	811.975	1579.91	1.94576	Cancer, Gastrointestinal Disease, Genetic Disorder, Neurological Disease	pyruvate kinase, muscle	Cytoplasm	kinase	PKM2
2519577	COL3A1	2	5.15e-09	1.45e-09	967	3.1e-11	552.732	1583.59	2.86502	Antigen Presentation, Cancer, Cardiovascular Disease, Connective Tissue Disorders, Dermatological Diseases and Conditions, Gastrointestinal Disease, Genetic Disorder, Inflammatory Response, Skeletal and Muscular Disorders	collagen, type III, alpha 1	Extracellular Space	other	COL3A1
2900059	HIST1H2BM	2	8.42e-06	7.17e-06	1439	1.63e-06	752.746	1617.34	2.14859		histone cluster 1, H2bm	Nucleus	other	HIST1H2BM
3013054	COL1A2	2	1.98e-09	5.7e-10	1017	1.15e-10	605.849	1632.31	2.69425	Cancer, Connective Tissue Disorders, Dermatological Diseases and Conditions, Developmental Disorder, Endocrine System Disorders, Gastrointestinal Disease, Genetic Disorder, Hepatic System Disease, Immunological Disease, Metabolic Disease, Organismal Injury and Abnormalities, Skeletal and Muscular Disorders	collagen, type I, alpha 2	Extracellular Space	other	COL1A2
2882098	SPARC	2	3.39e-09	2.25e-09	1153	3.34e-09	842.285	1789.94	2.1251	Cancer, Gastrointestinal Disease, Genetic Disorder, Infectious Disease, Neurological Disease, Organismal Injury and Abnormalities, Reproductive System Disease, Respiratory Disease, Skeletal and Muscular Disorders	secreted protein, acidic, cysteine-rich (osteonectin)	Extracellular Space	other	SPARC
3976341	TIMP1	2	3.18e-09	1.53e-09	1084	6.25e-10	1007.55	2520.84	2.50196	Antigen Presentation, Cancer, Cardiovascular Disease, Connective Tissue Disorders, Developmental Disorder, Endocrine System Disorders, Gastrointestinal Disease, Genetic Disorder, Hematological Disease, Hepatic System Disease, Hypersensitivity Response, Immunological Disease, Infectious Disease, Inflammatory Disease, Inflammatory Response, Metabolic Disease, Neurological Disease, Ophthalmic Diseas…	TIMP metallopeptidase inhibitor 1	Extracellular Space	other	TIMP1
3933559	TFF1	2	8.05e-07	7.89e-07	3819	6.28e-06	5244.85	2777.27	-1.88849	Antigen Presentation, Cancer, Gastrointestinal Disease, Genetic Disorder, Inflammatory Disease, Inflammatory Response, Renal and Urological Disease, Reproductive System Disease	trefoil factor 1	Extracellular Space	other	TFF1
